# Supplementary material for: Origins and evolutionary genomics of the 2009 swine-origin H1N1 influenza A epidemic
Source: Springer Nature journal article supplement (doi:10.1038/nature08182), 2009-06-01
Supplement: 41586_2009_BFnature08182_MOESM328_ESM.pdf [file 41586_2009_BFnature08182_MOESM328_ESM.pdf]

**Supplementary Figure 1.** Phylogenetic relationships of each gene segment (PB2, PB1, PA, HA, NP, NA, M & NS) of swine influenza A viruses indicating genetic components of the swine-origin influenza A (H1N1) virus. Clade labels indicate major swine lineages. Human viruses are coloured blue, swine viruses in red and avian viruses in green.

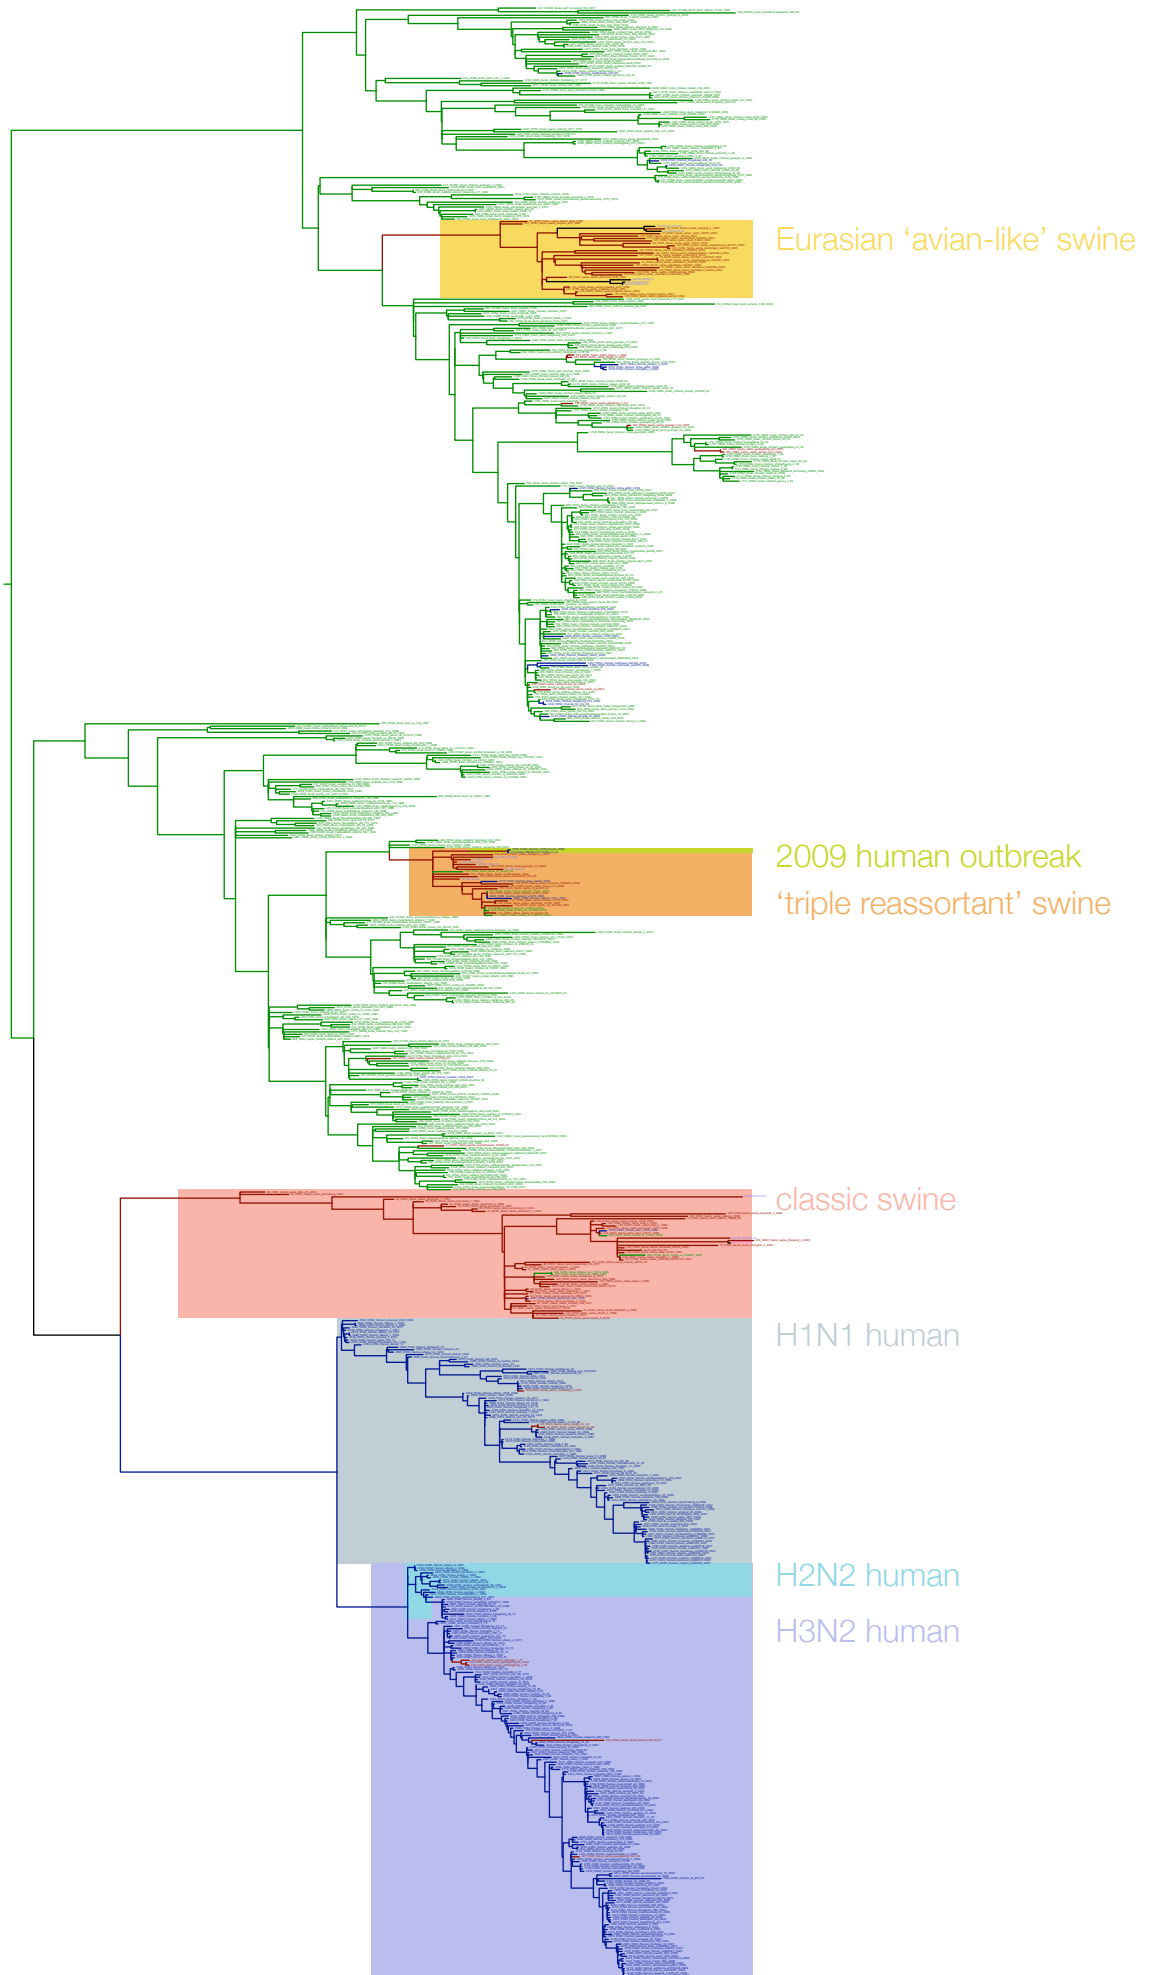

0.03

PB1

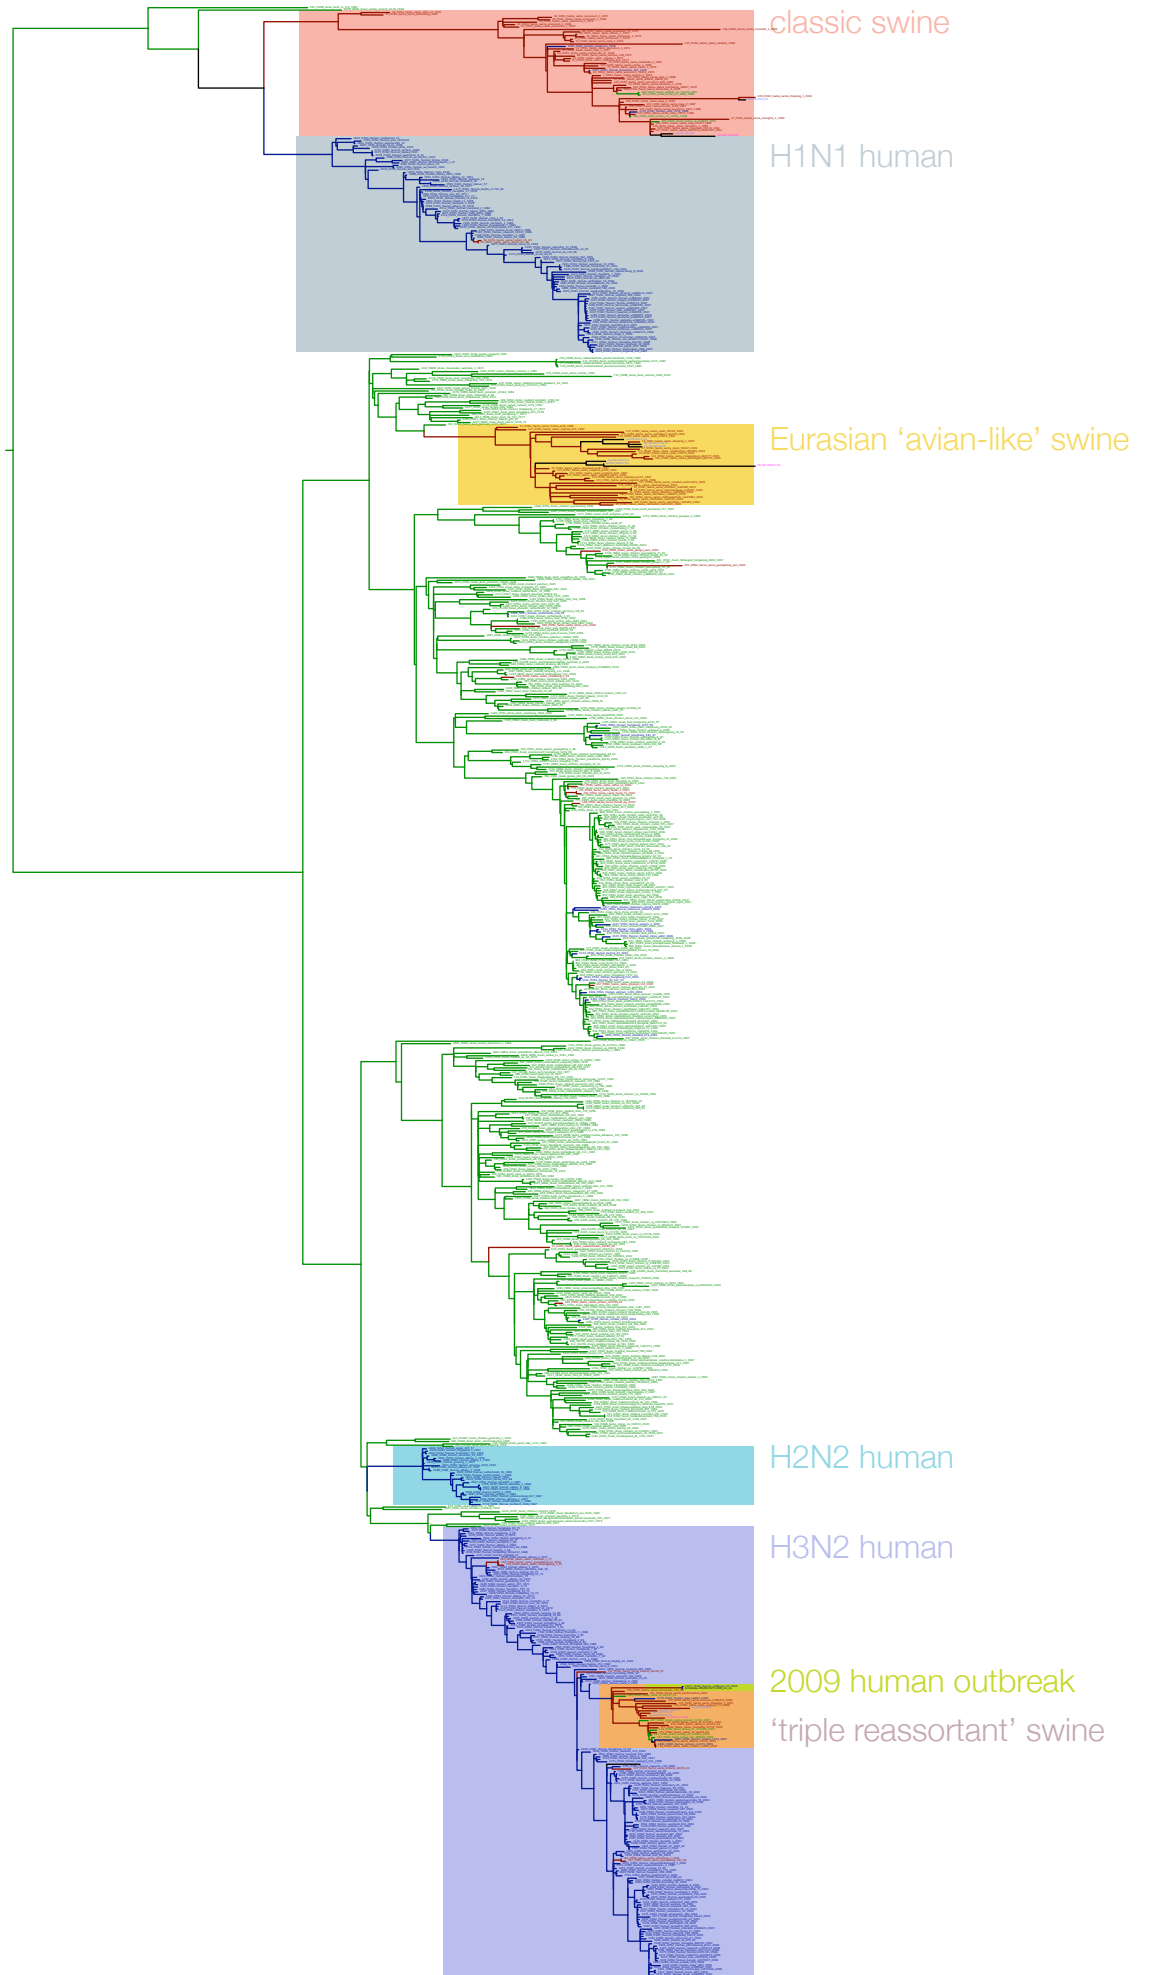

0.05

PA

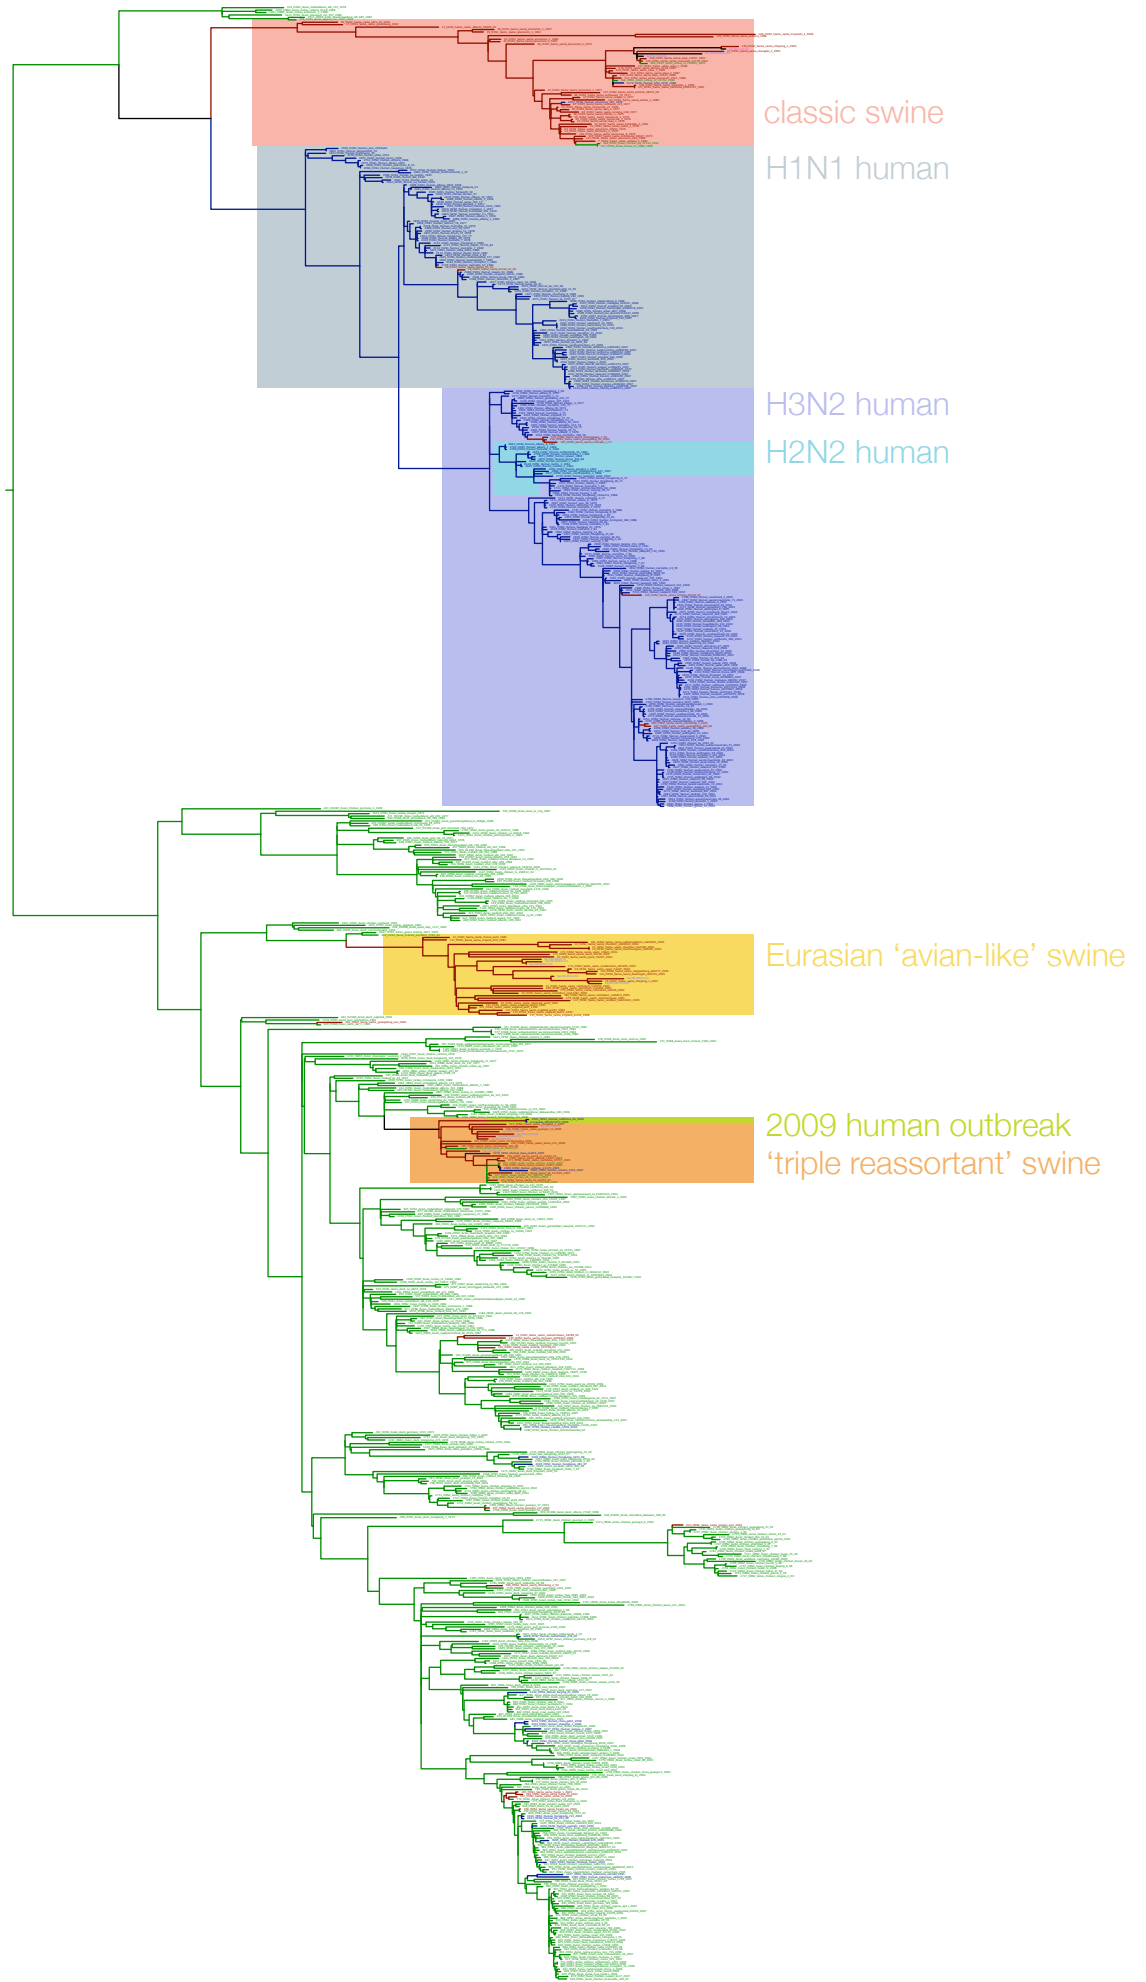

0.05

HA H1

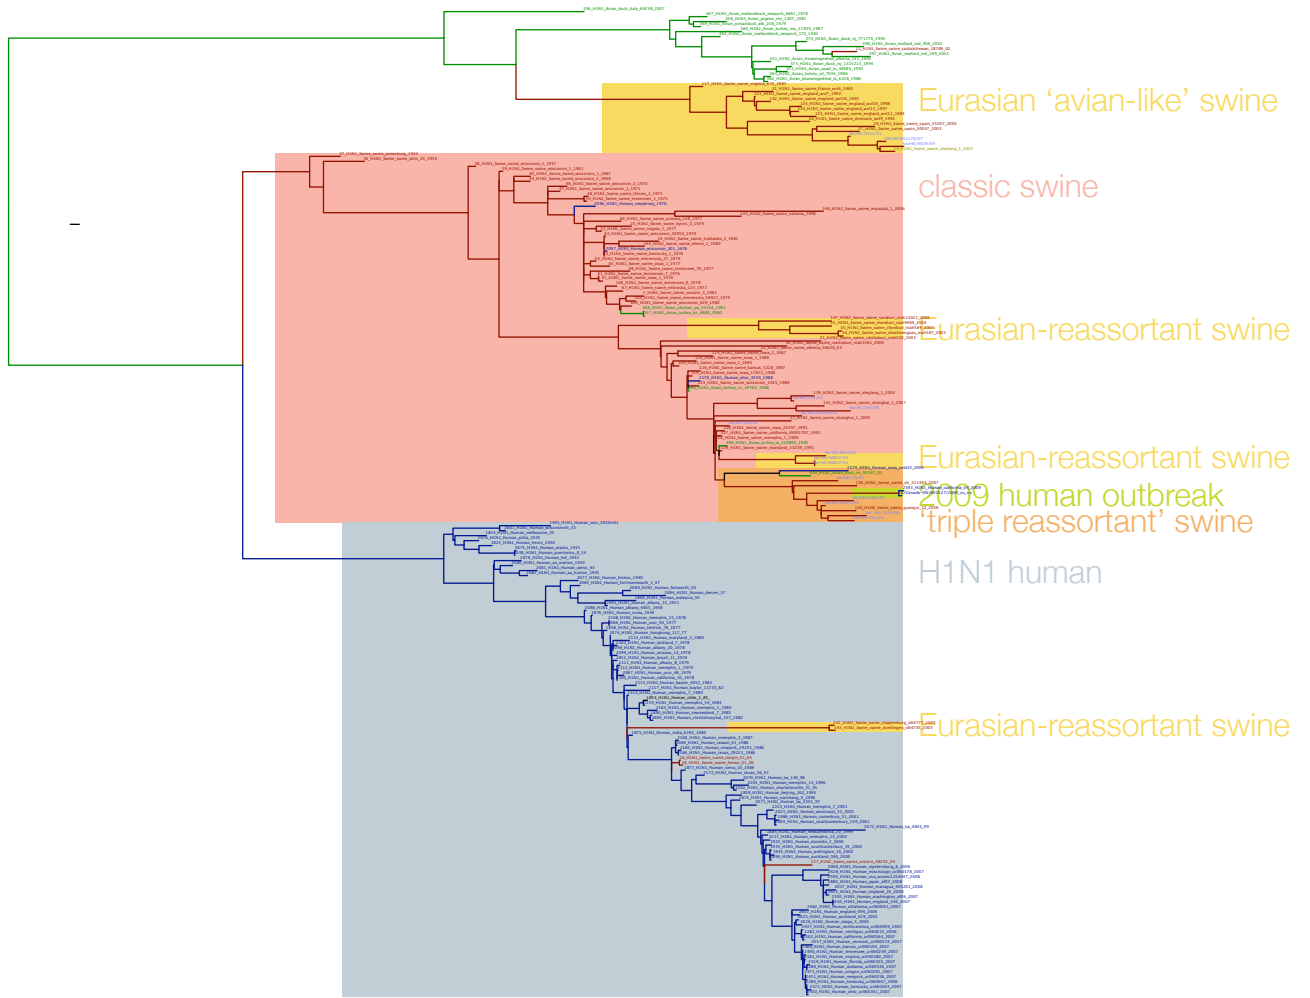

0.07

H3

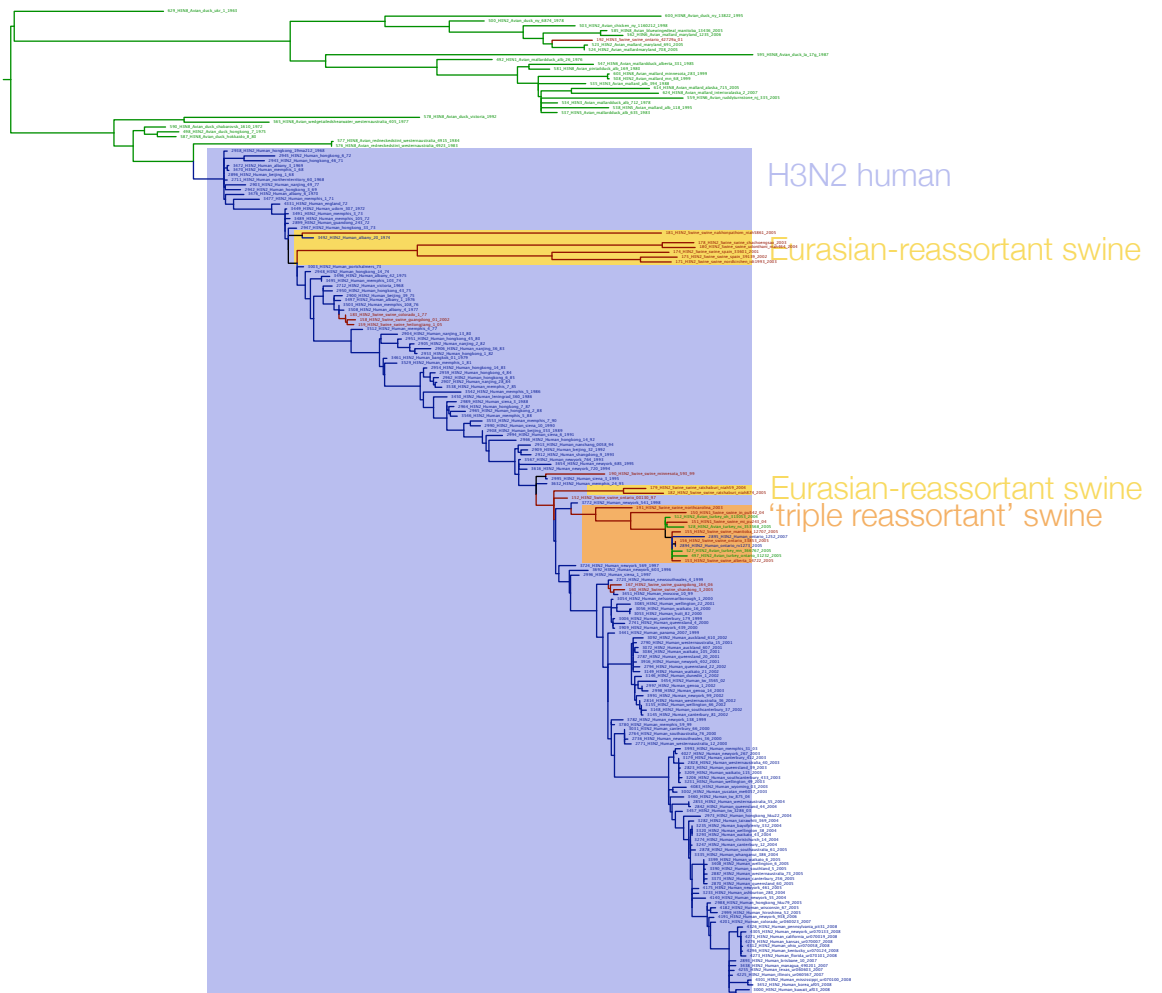

0.05

NP

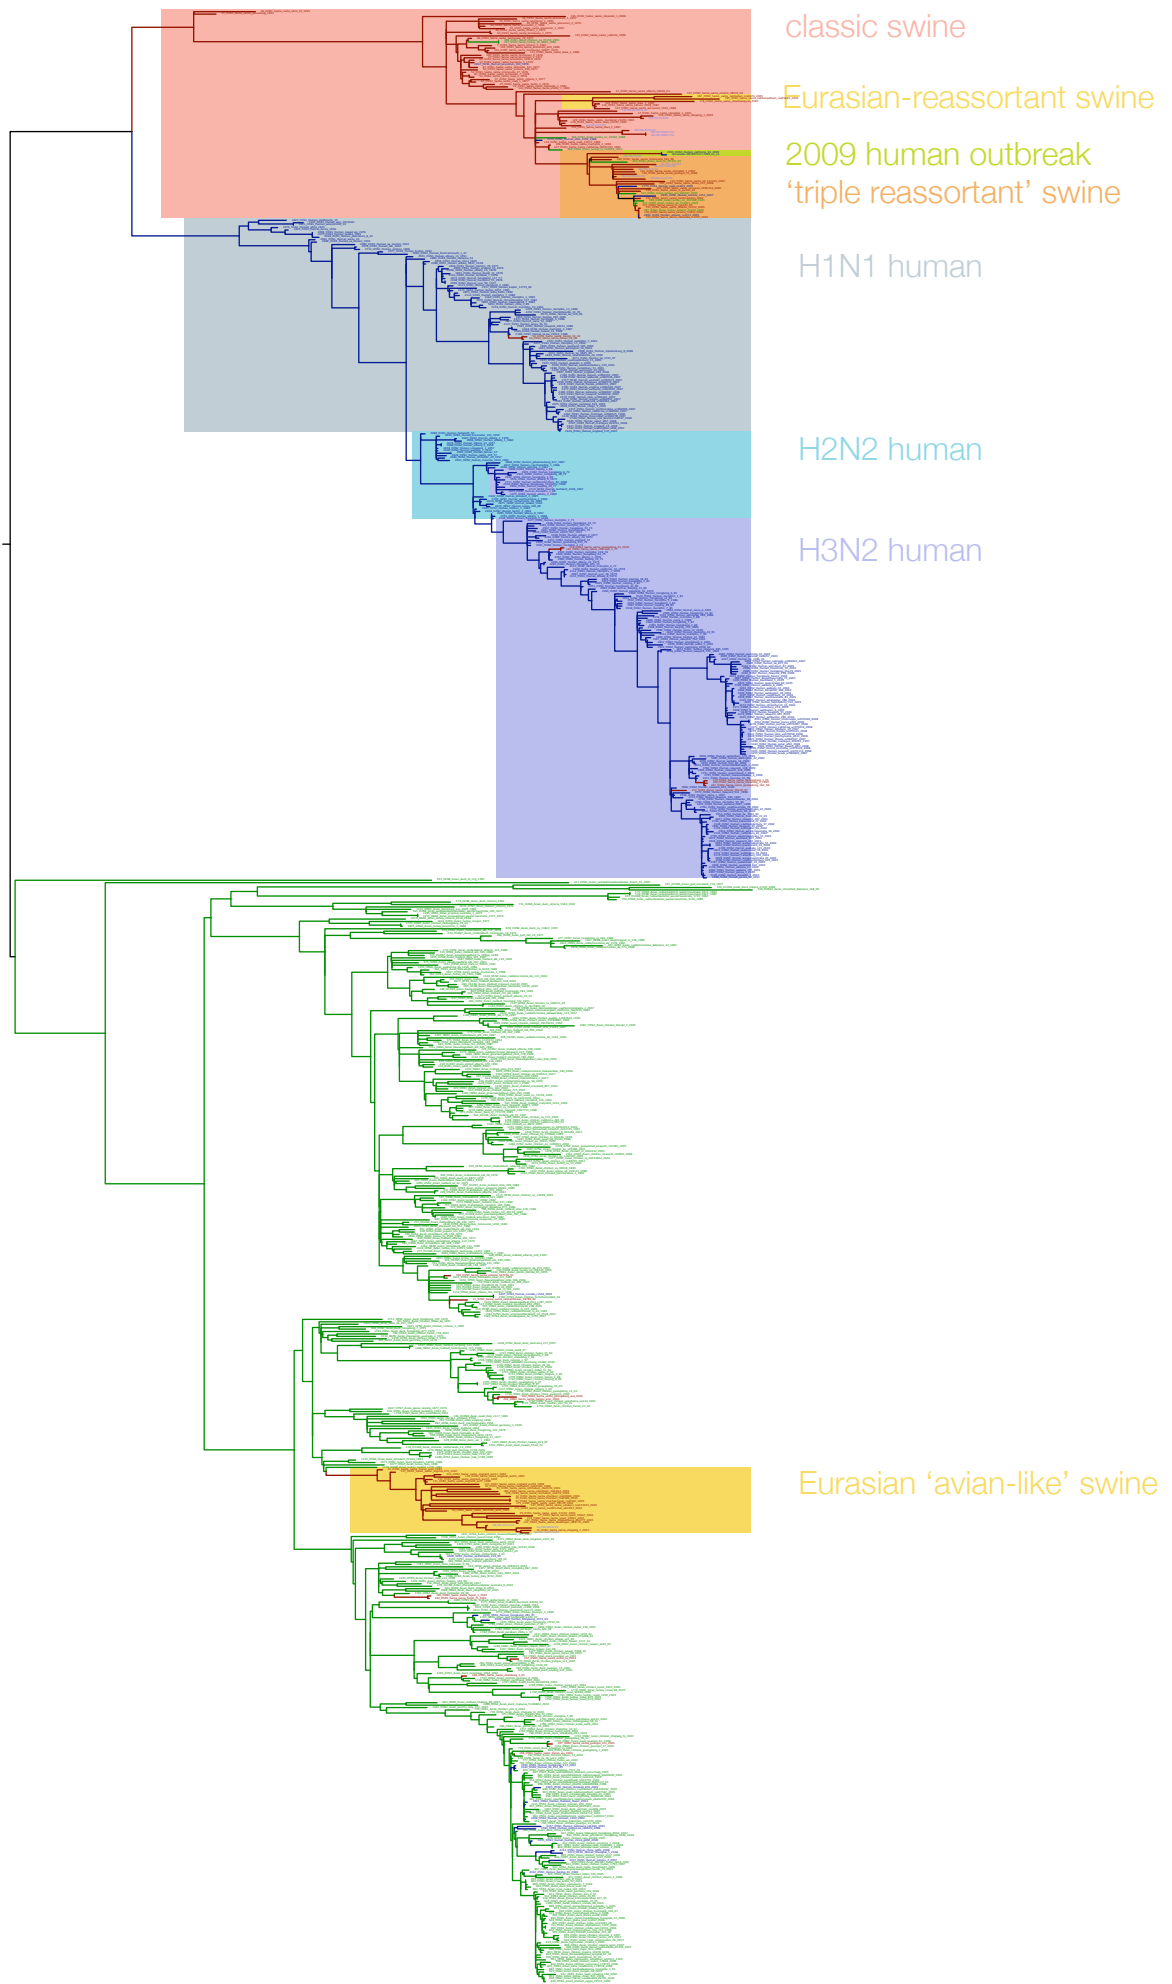

0.05

NA N1

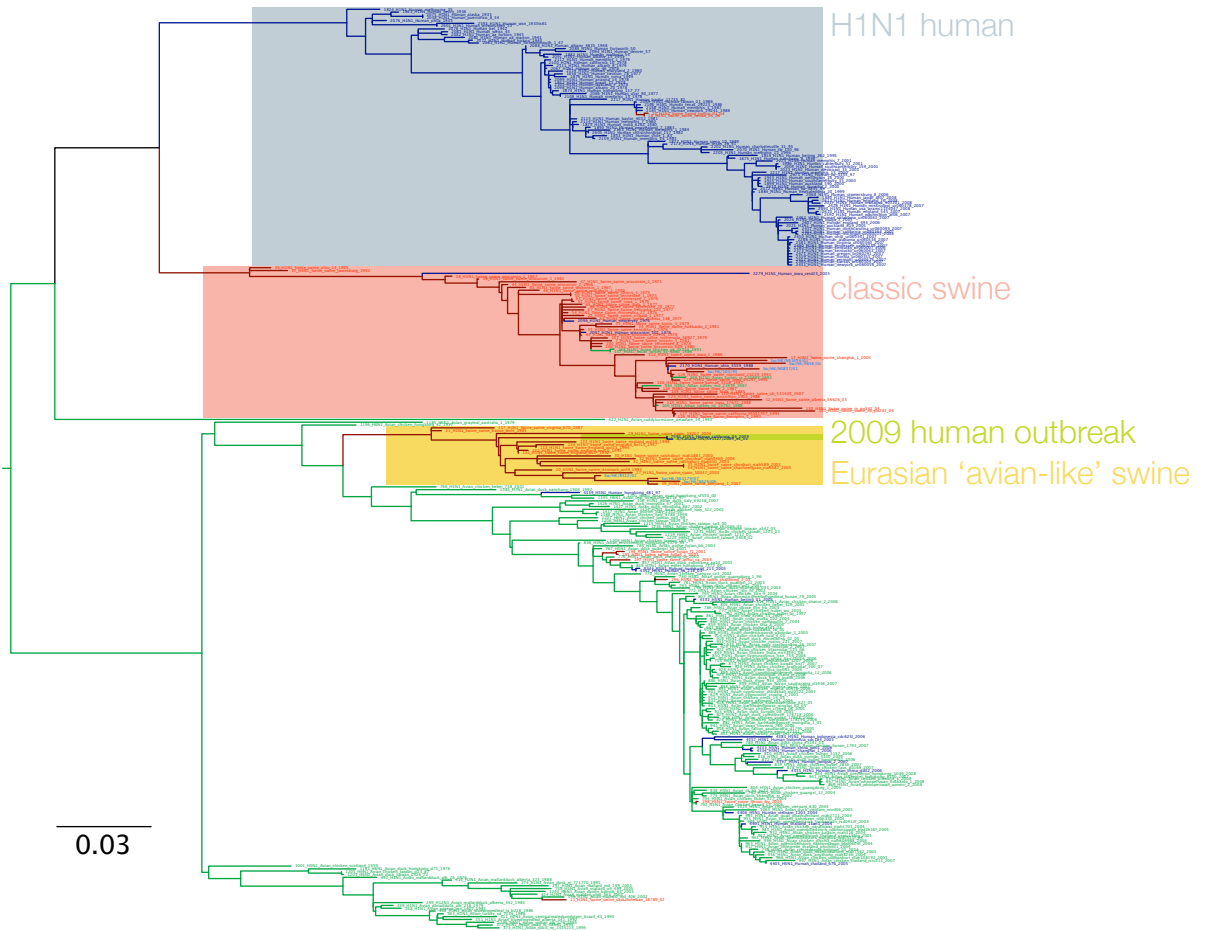

N2

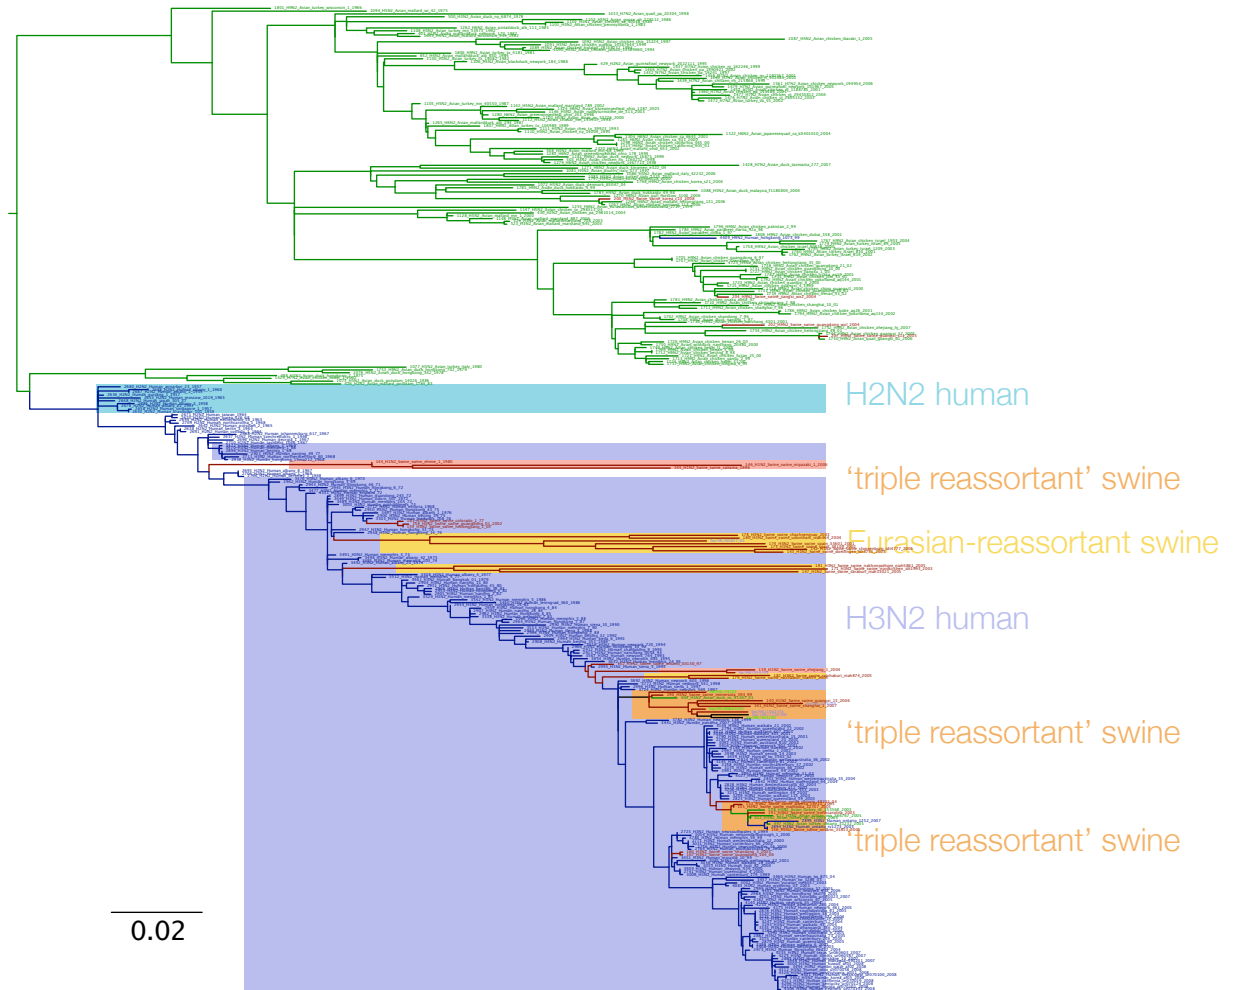

M

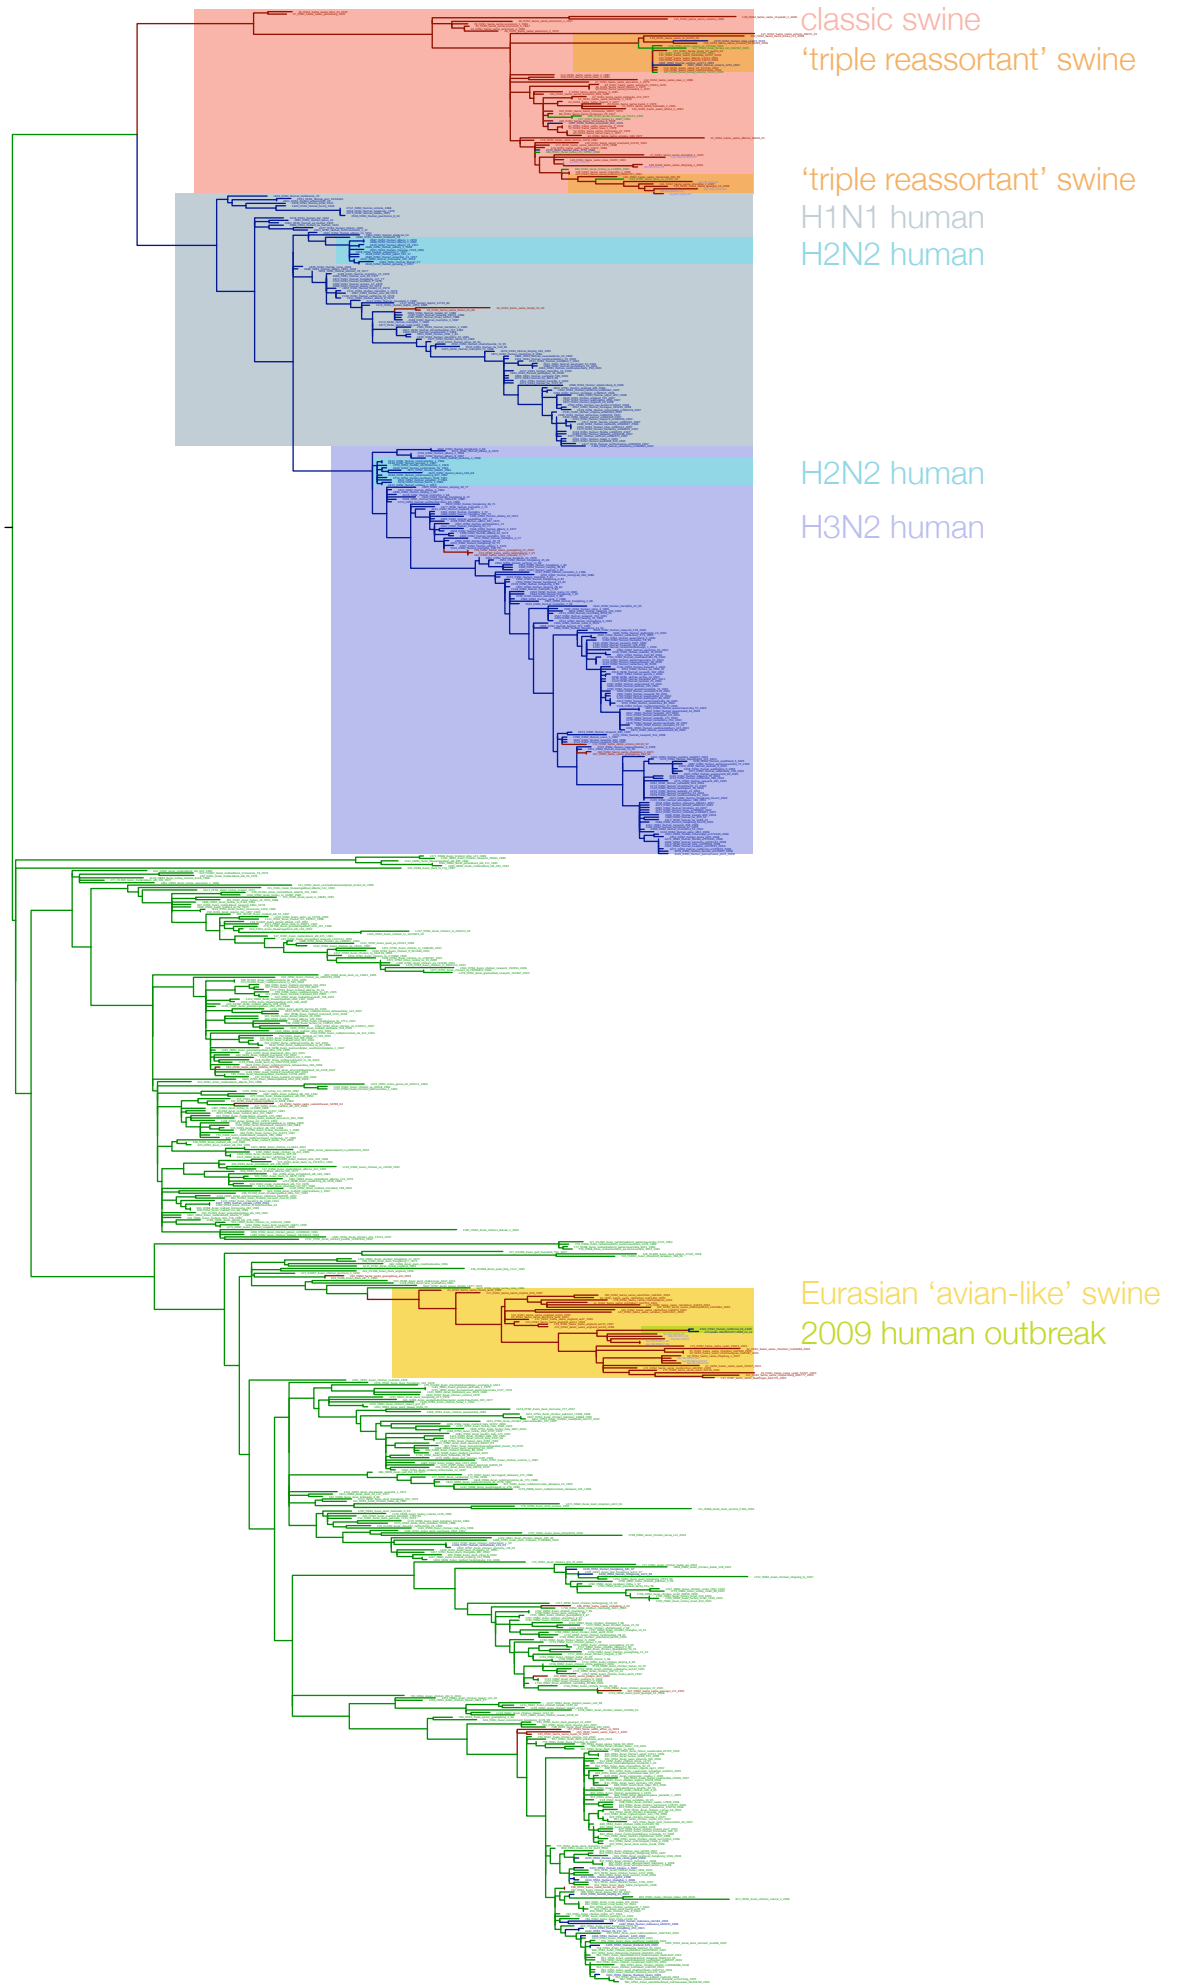

0.03



NS

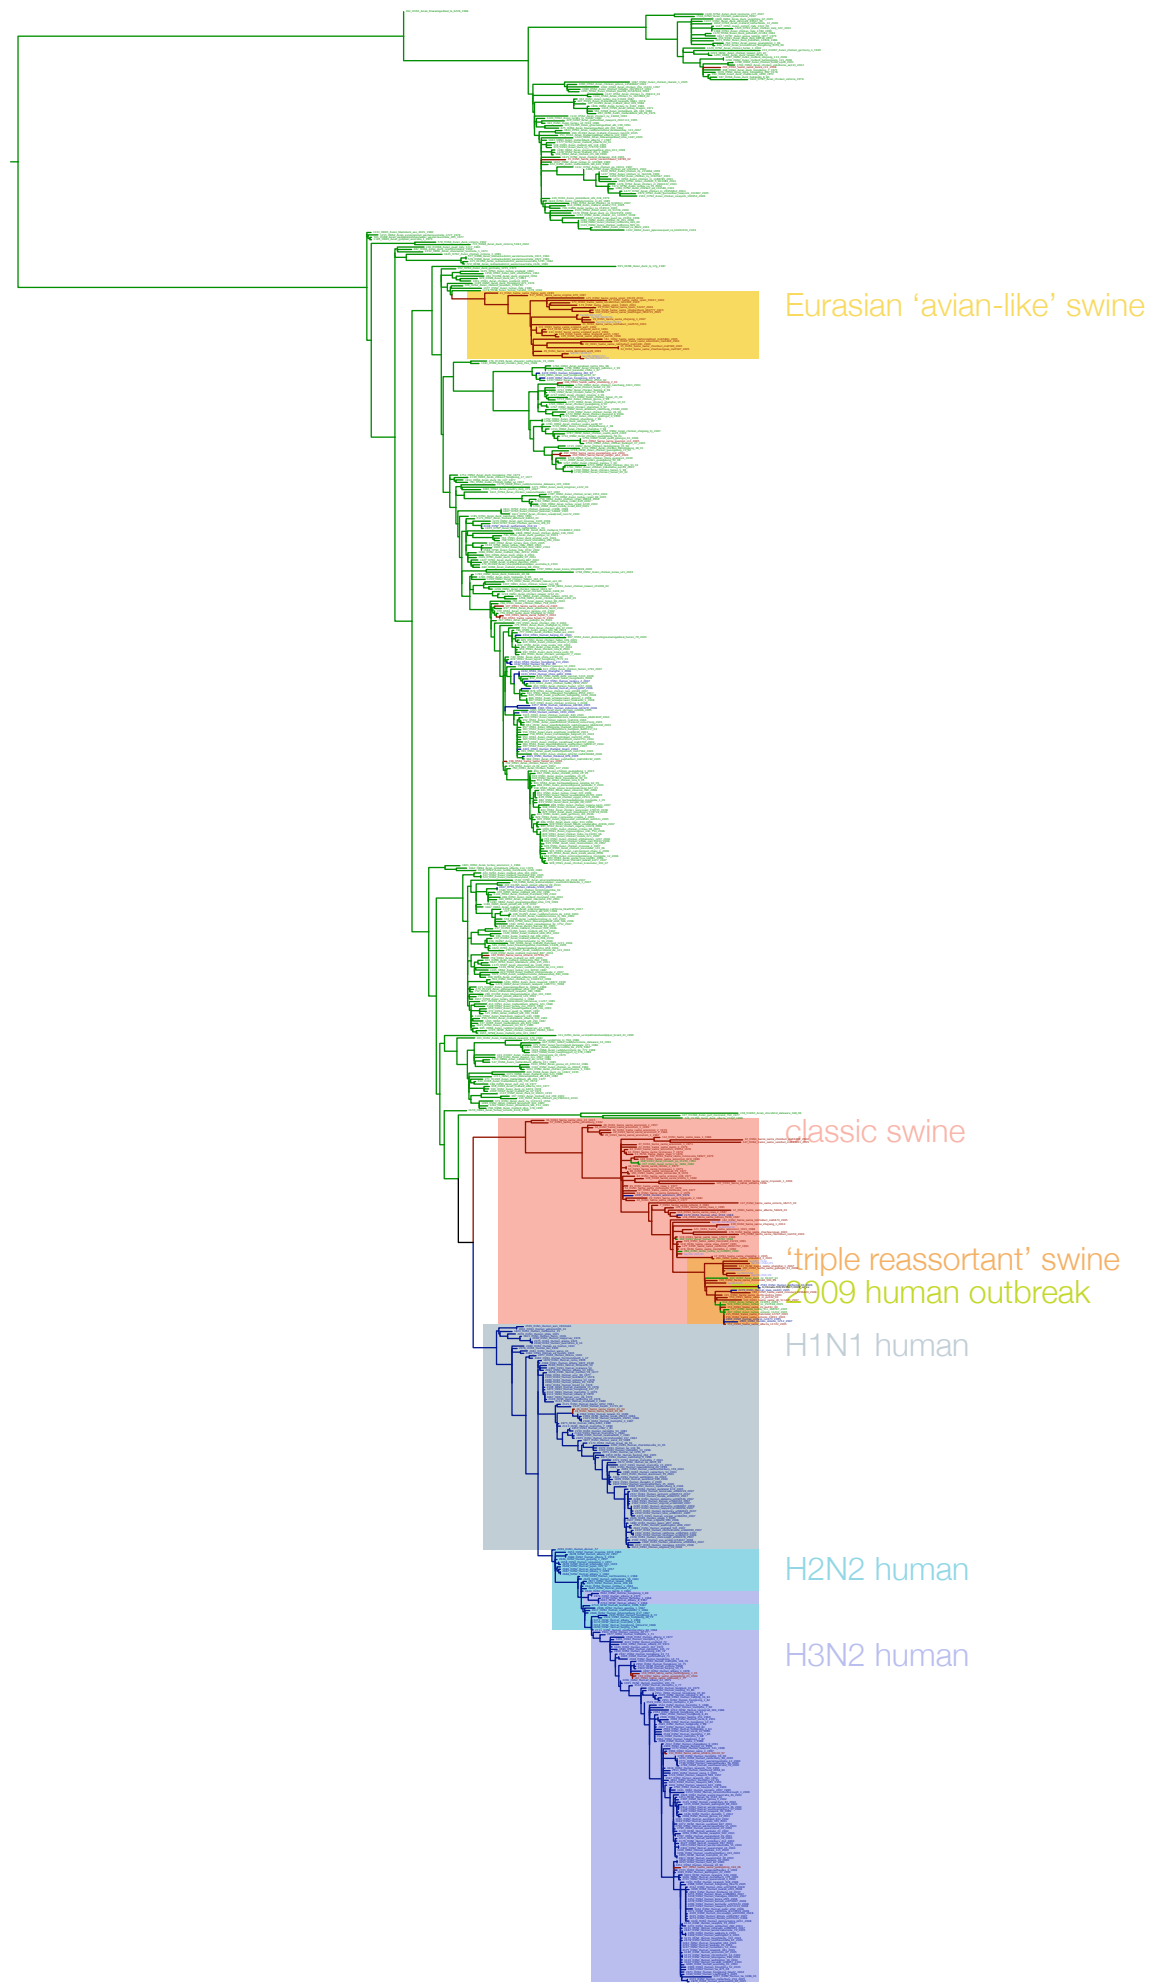

0.1

**Supplementary Figure 2.** Phylogenetic relationships scaled to time for each gene segment (PB2, PB1, PA, HA, NP, NA, M & NS) of the swine-origin influenza A (H1N1) virus as represented in Figure 2 of the main text but with full virus names and GenBank accession numbers. Internal nodes are reconstructed common ancestors with 95% credible intervals on their date given by the grey bars. Human viruses are coloured blue, swine viruses in red and avian viruses in green. Newly described Hong Kong sequences have bold labels. Sw/HK/915/04 (H1N2) is highlighted with an arrow when present (see main text). Timeline is in years.

PB2

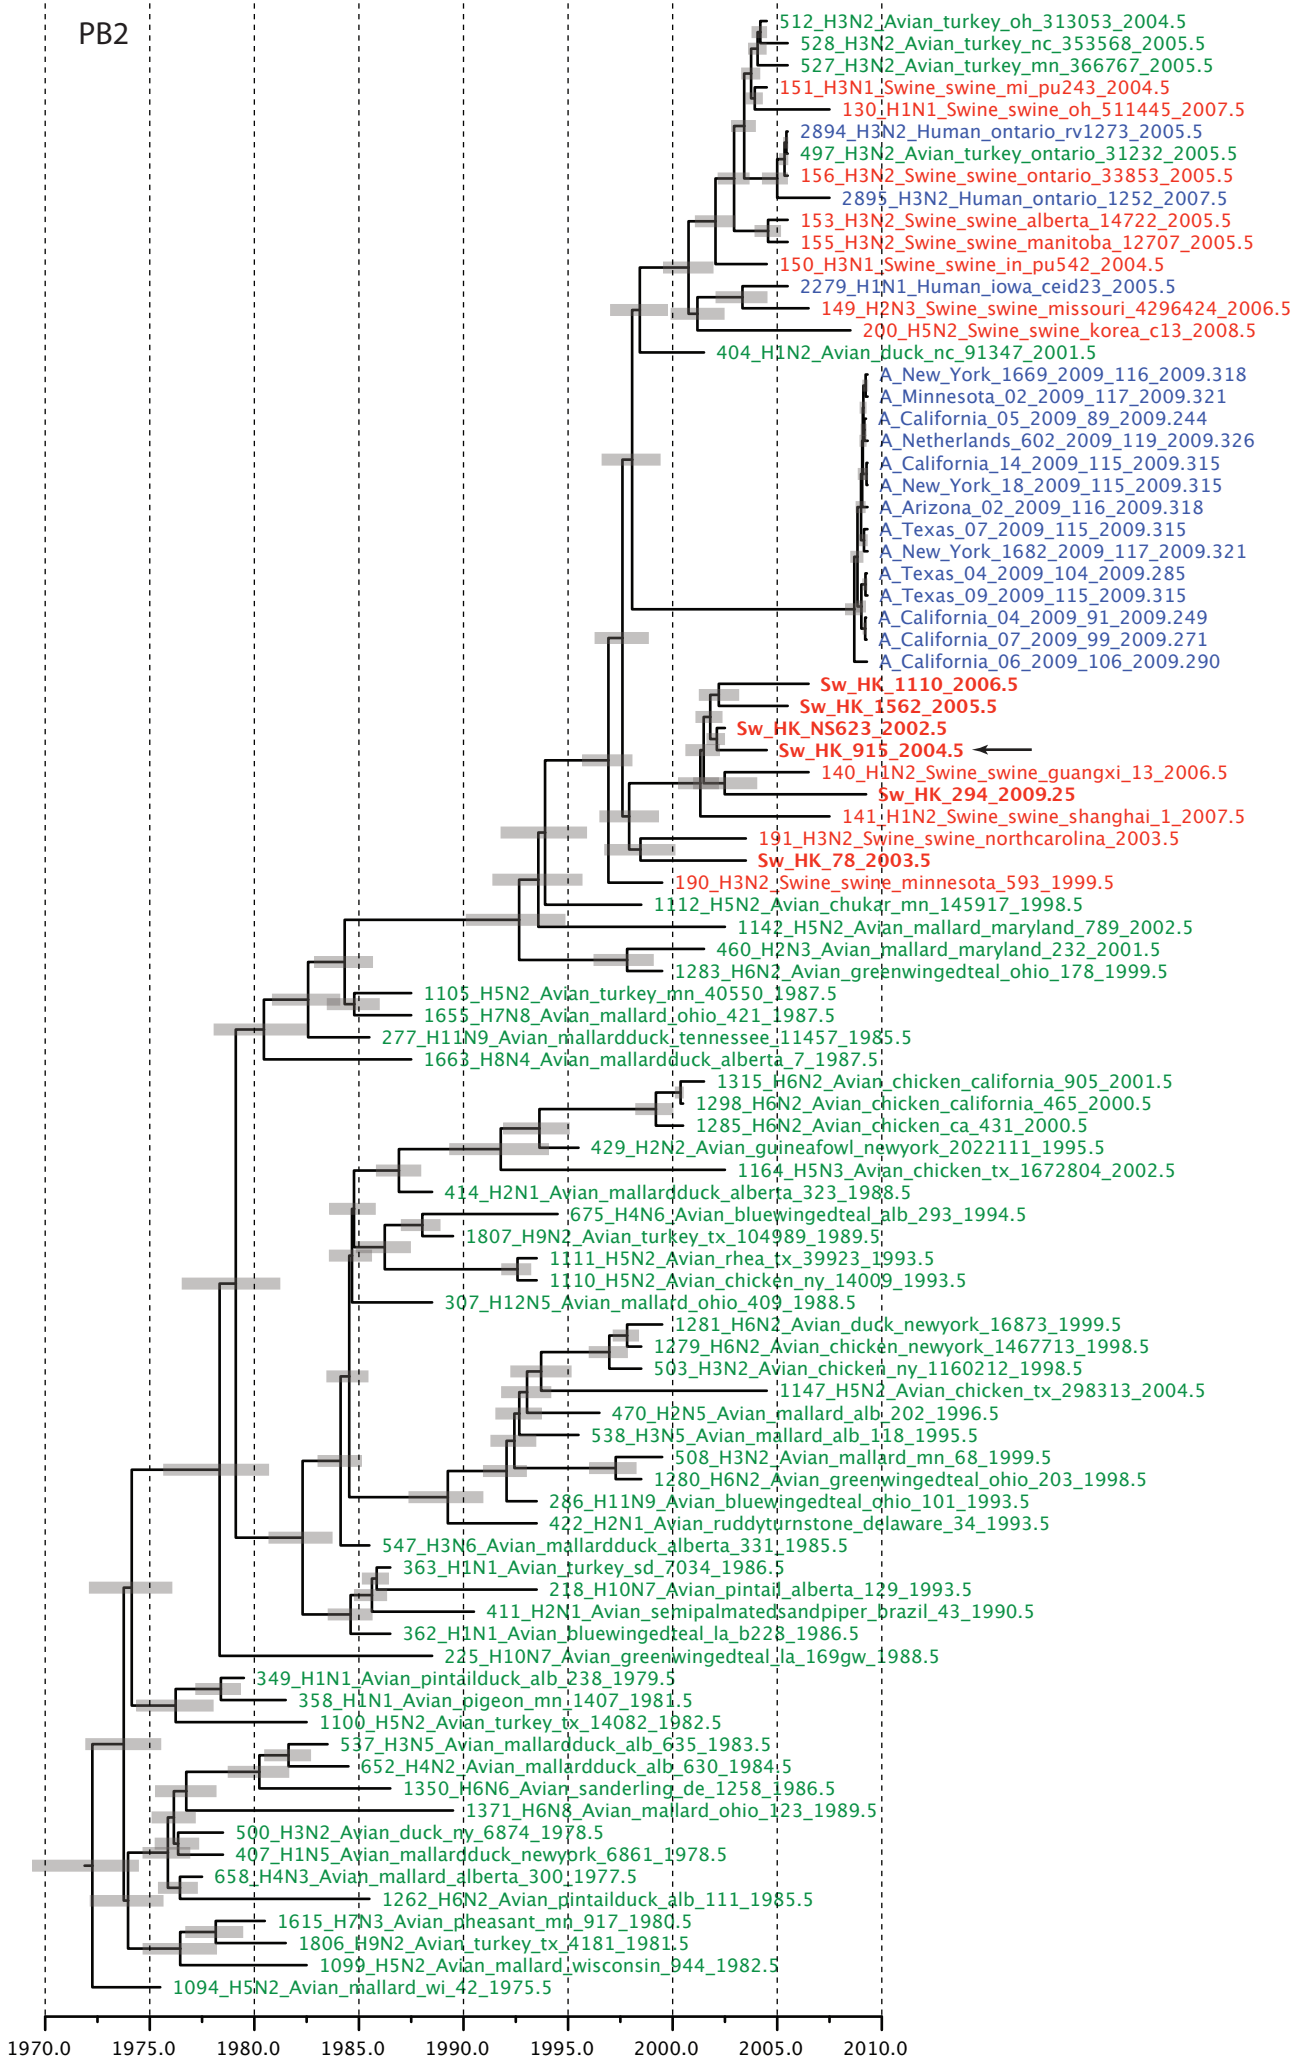



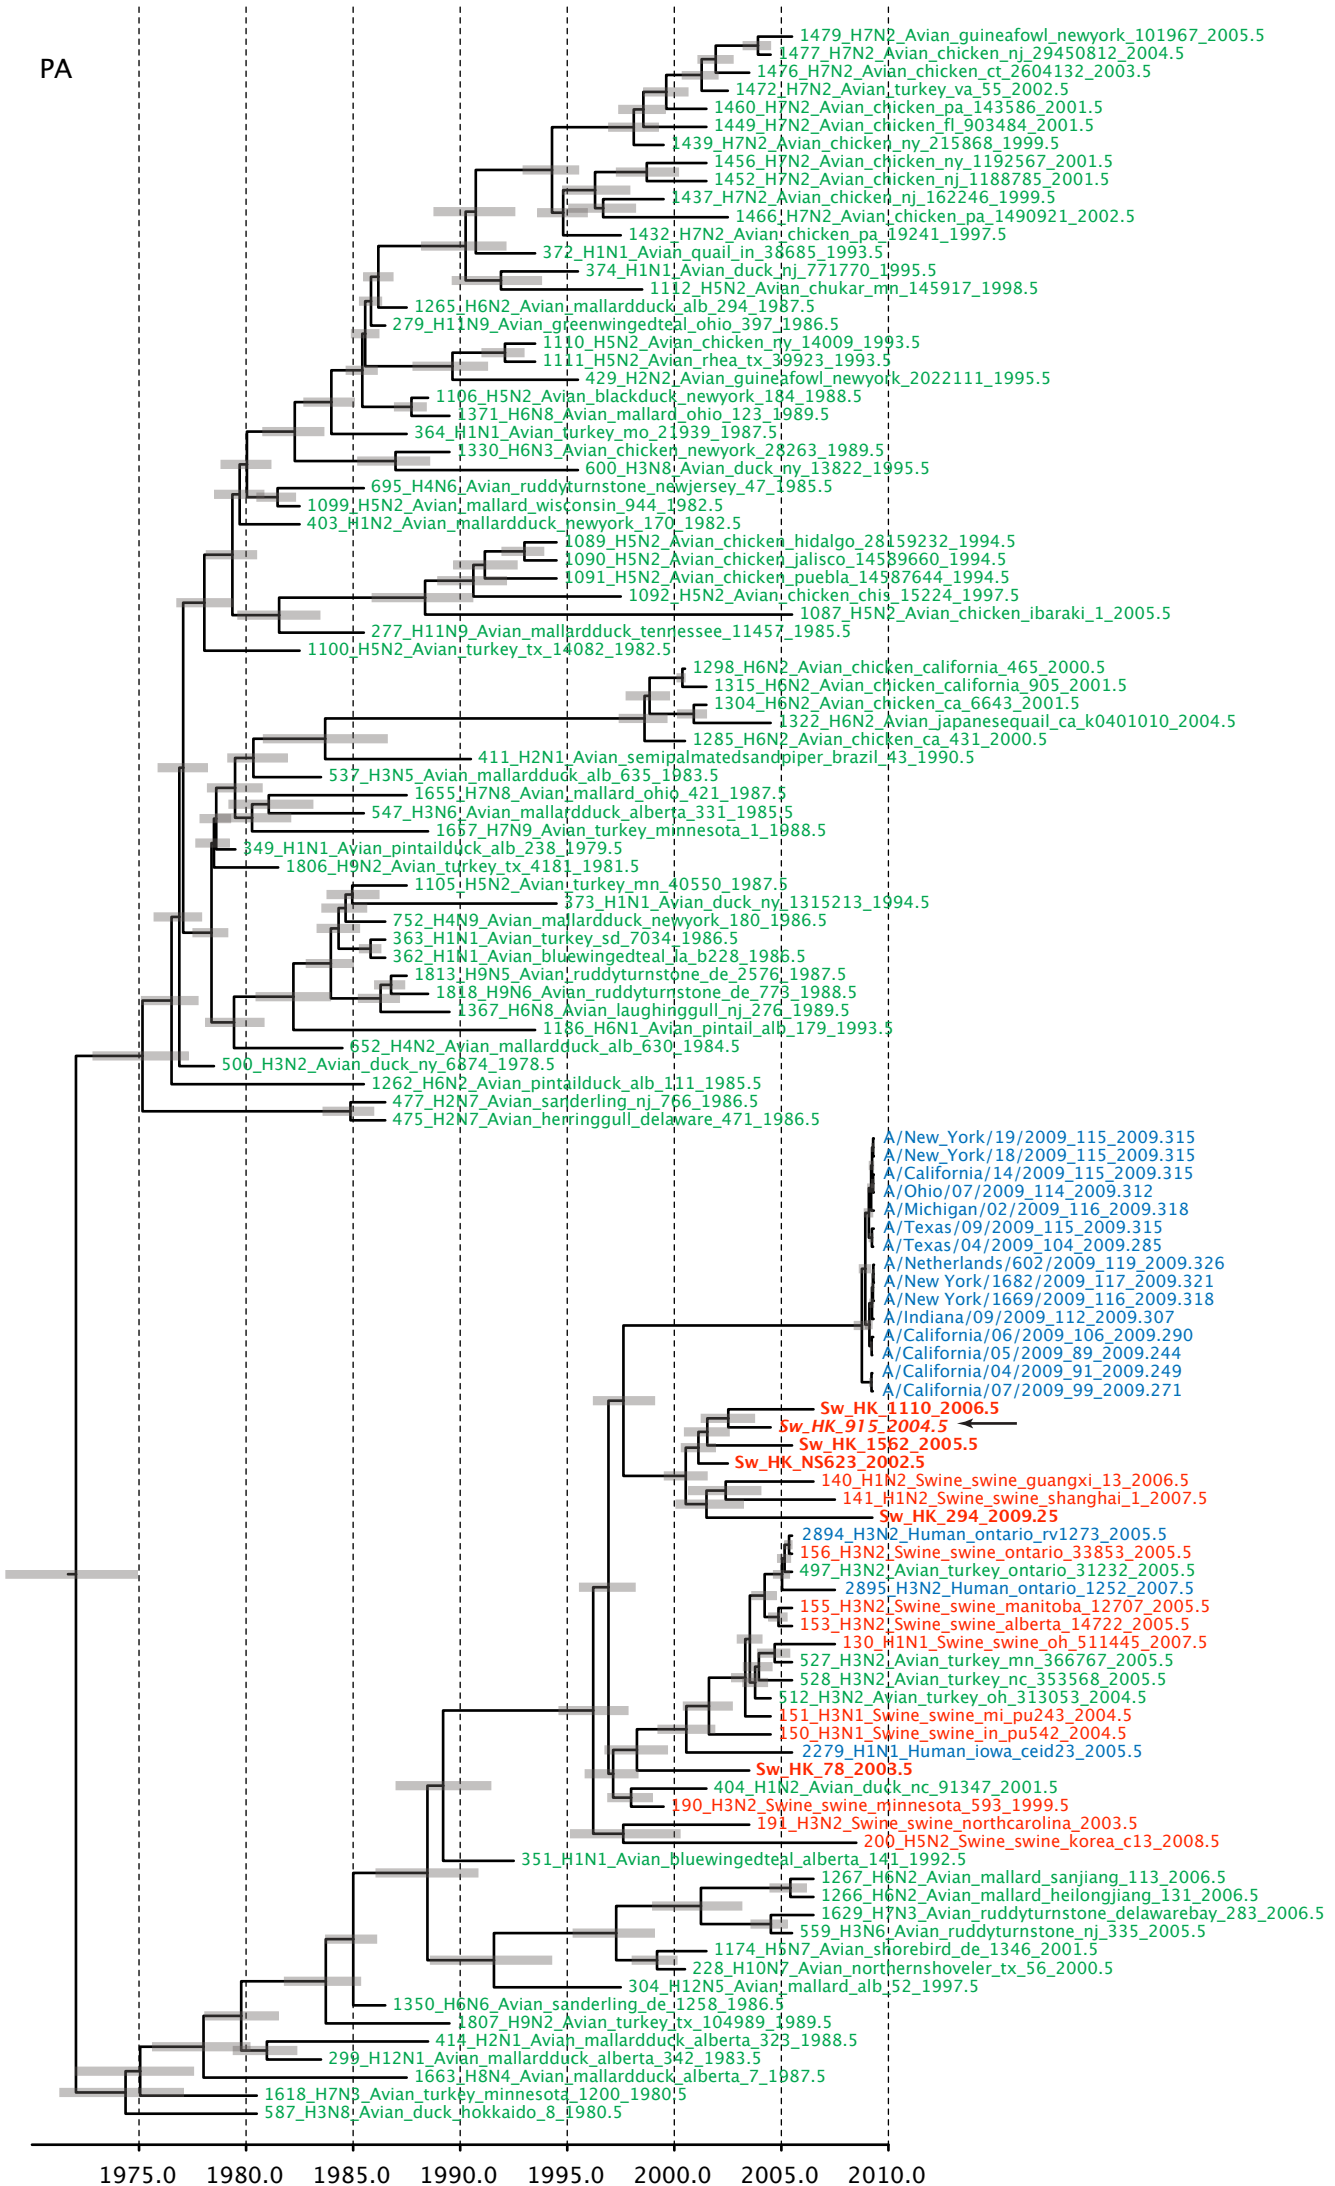

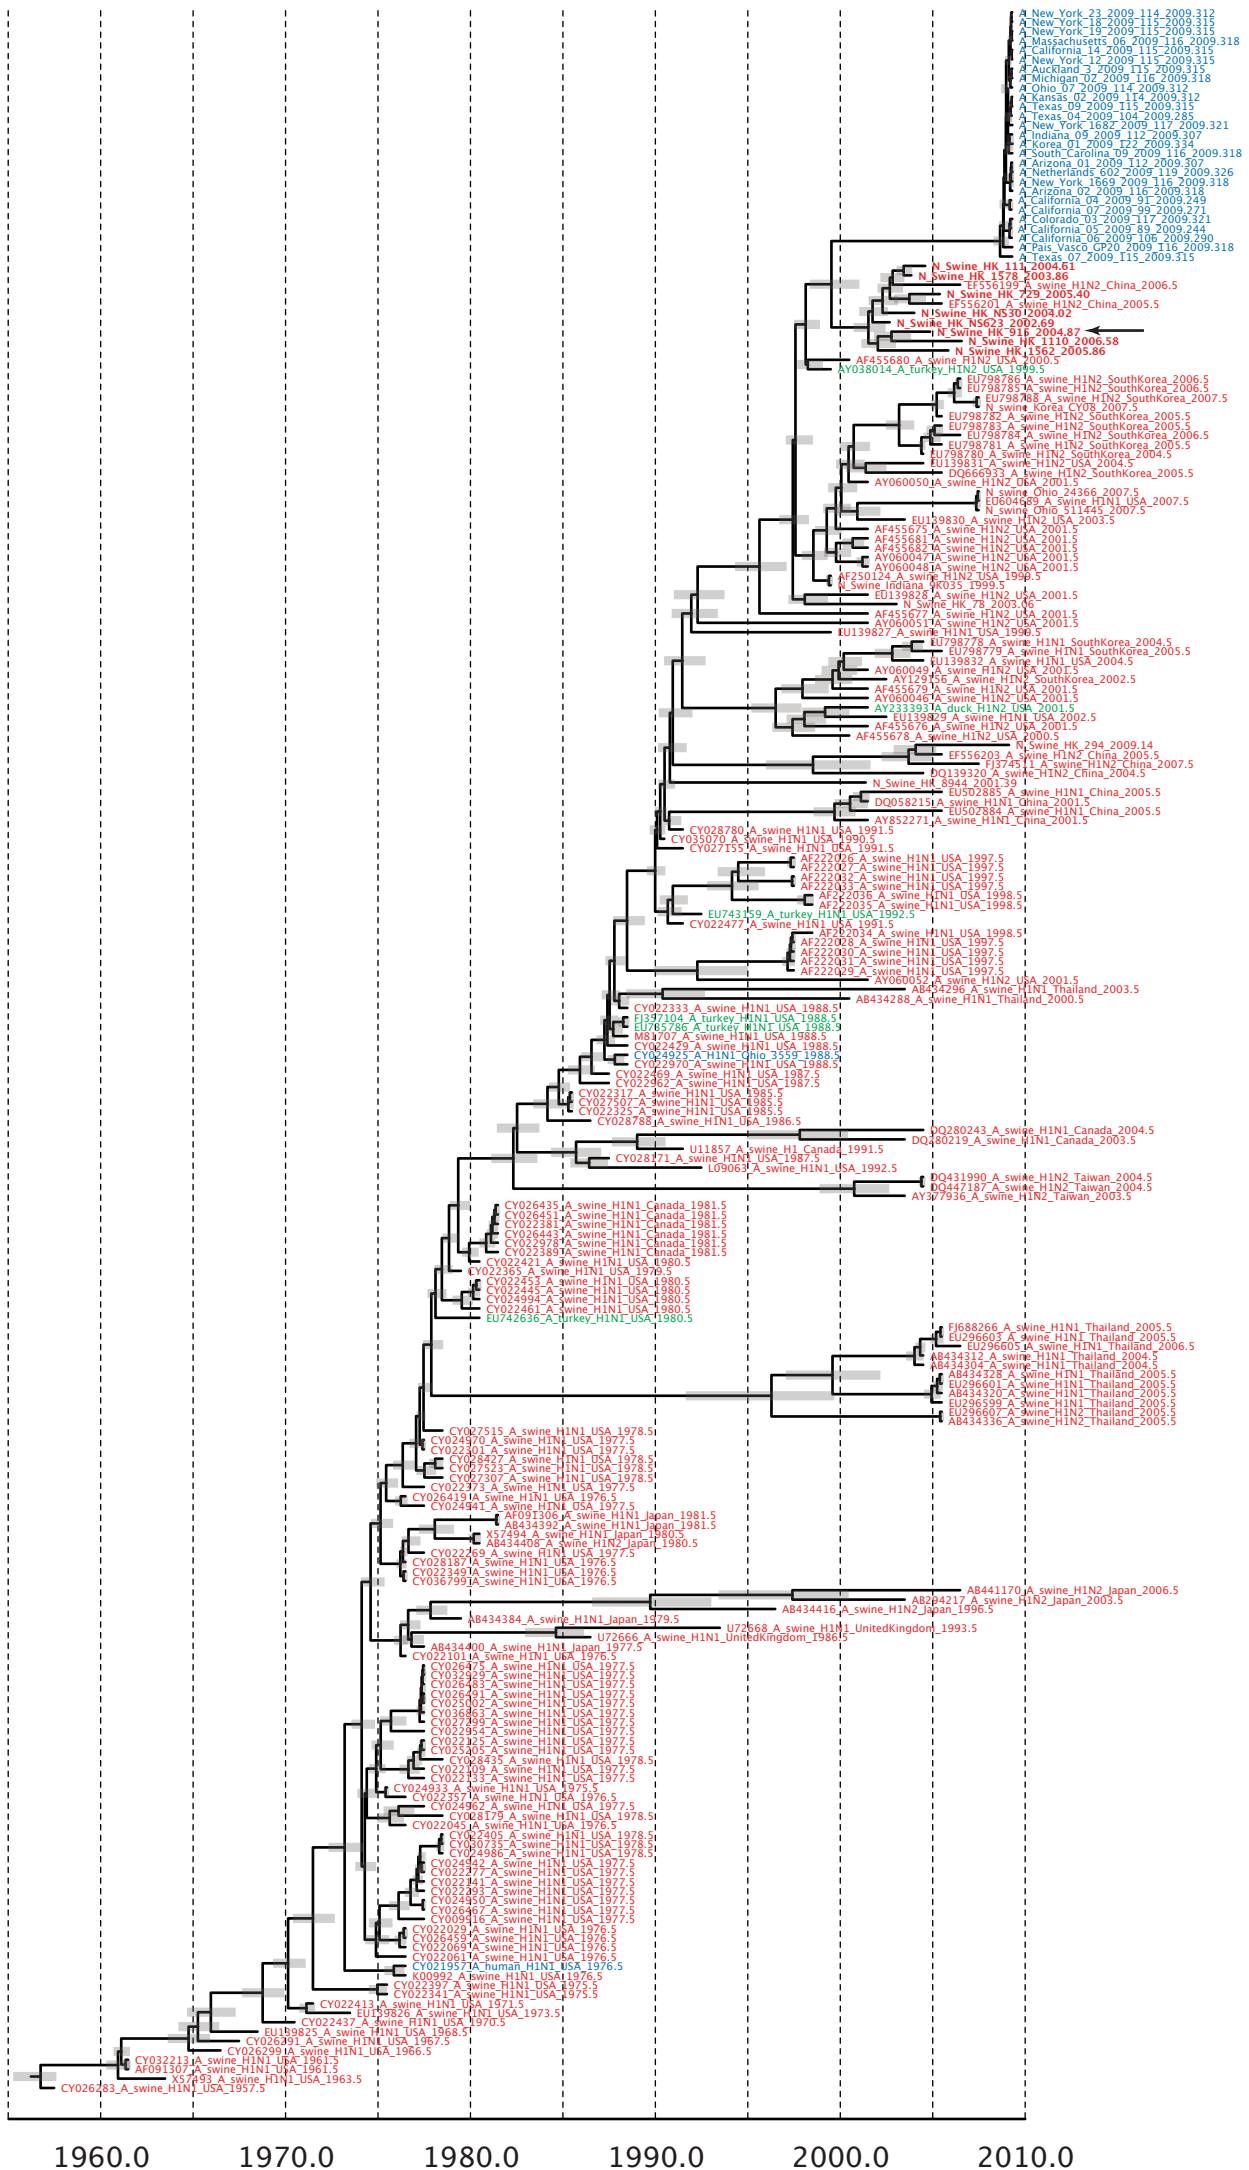

NP

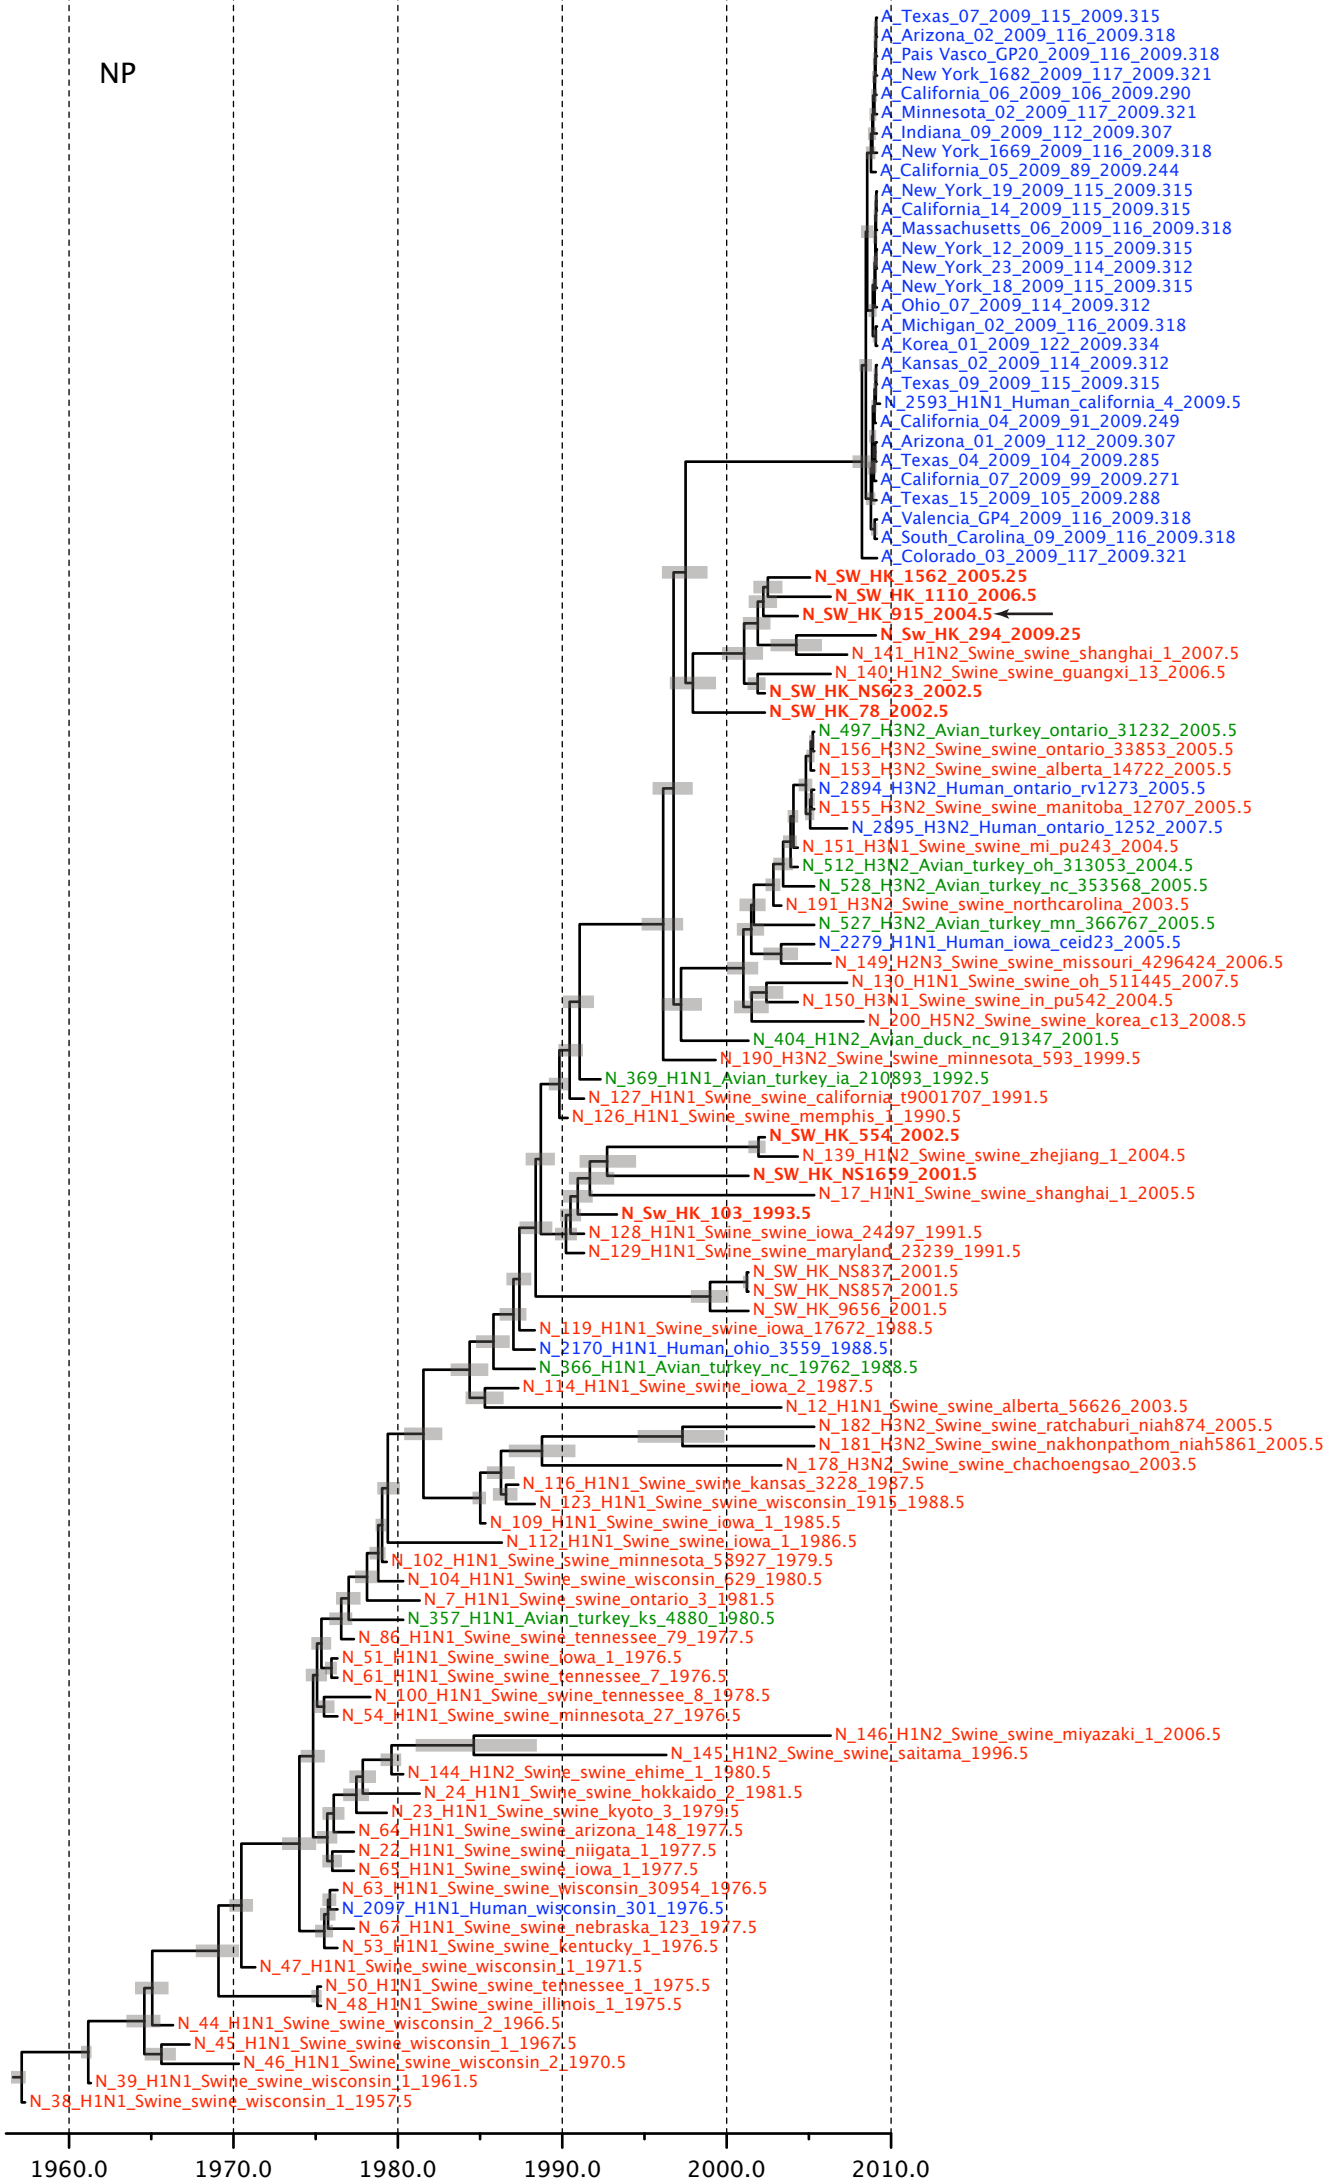

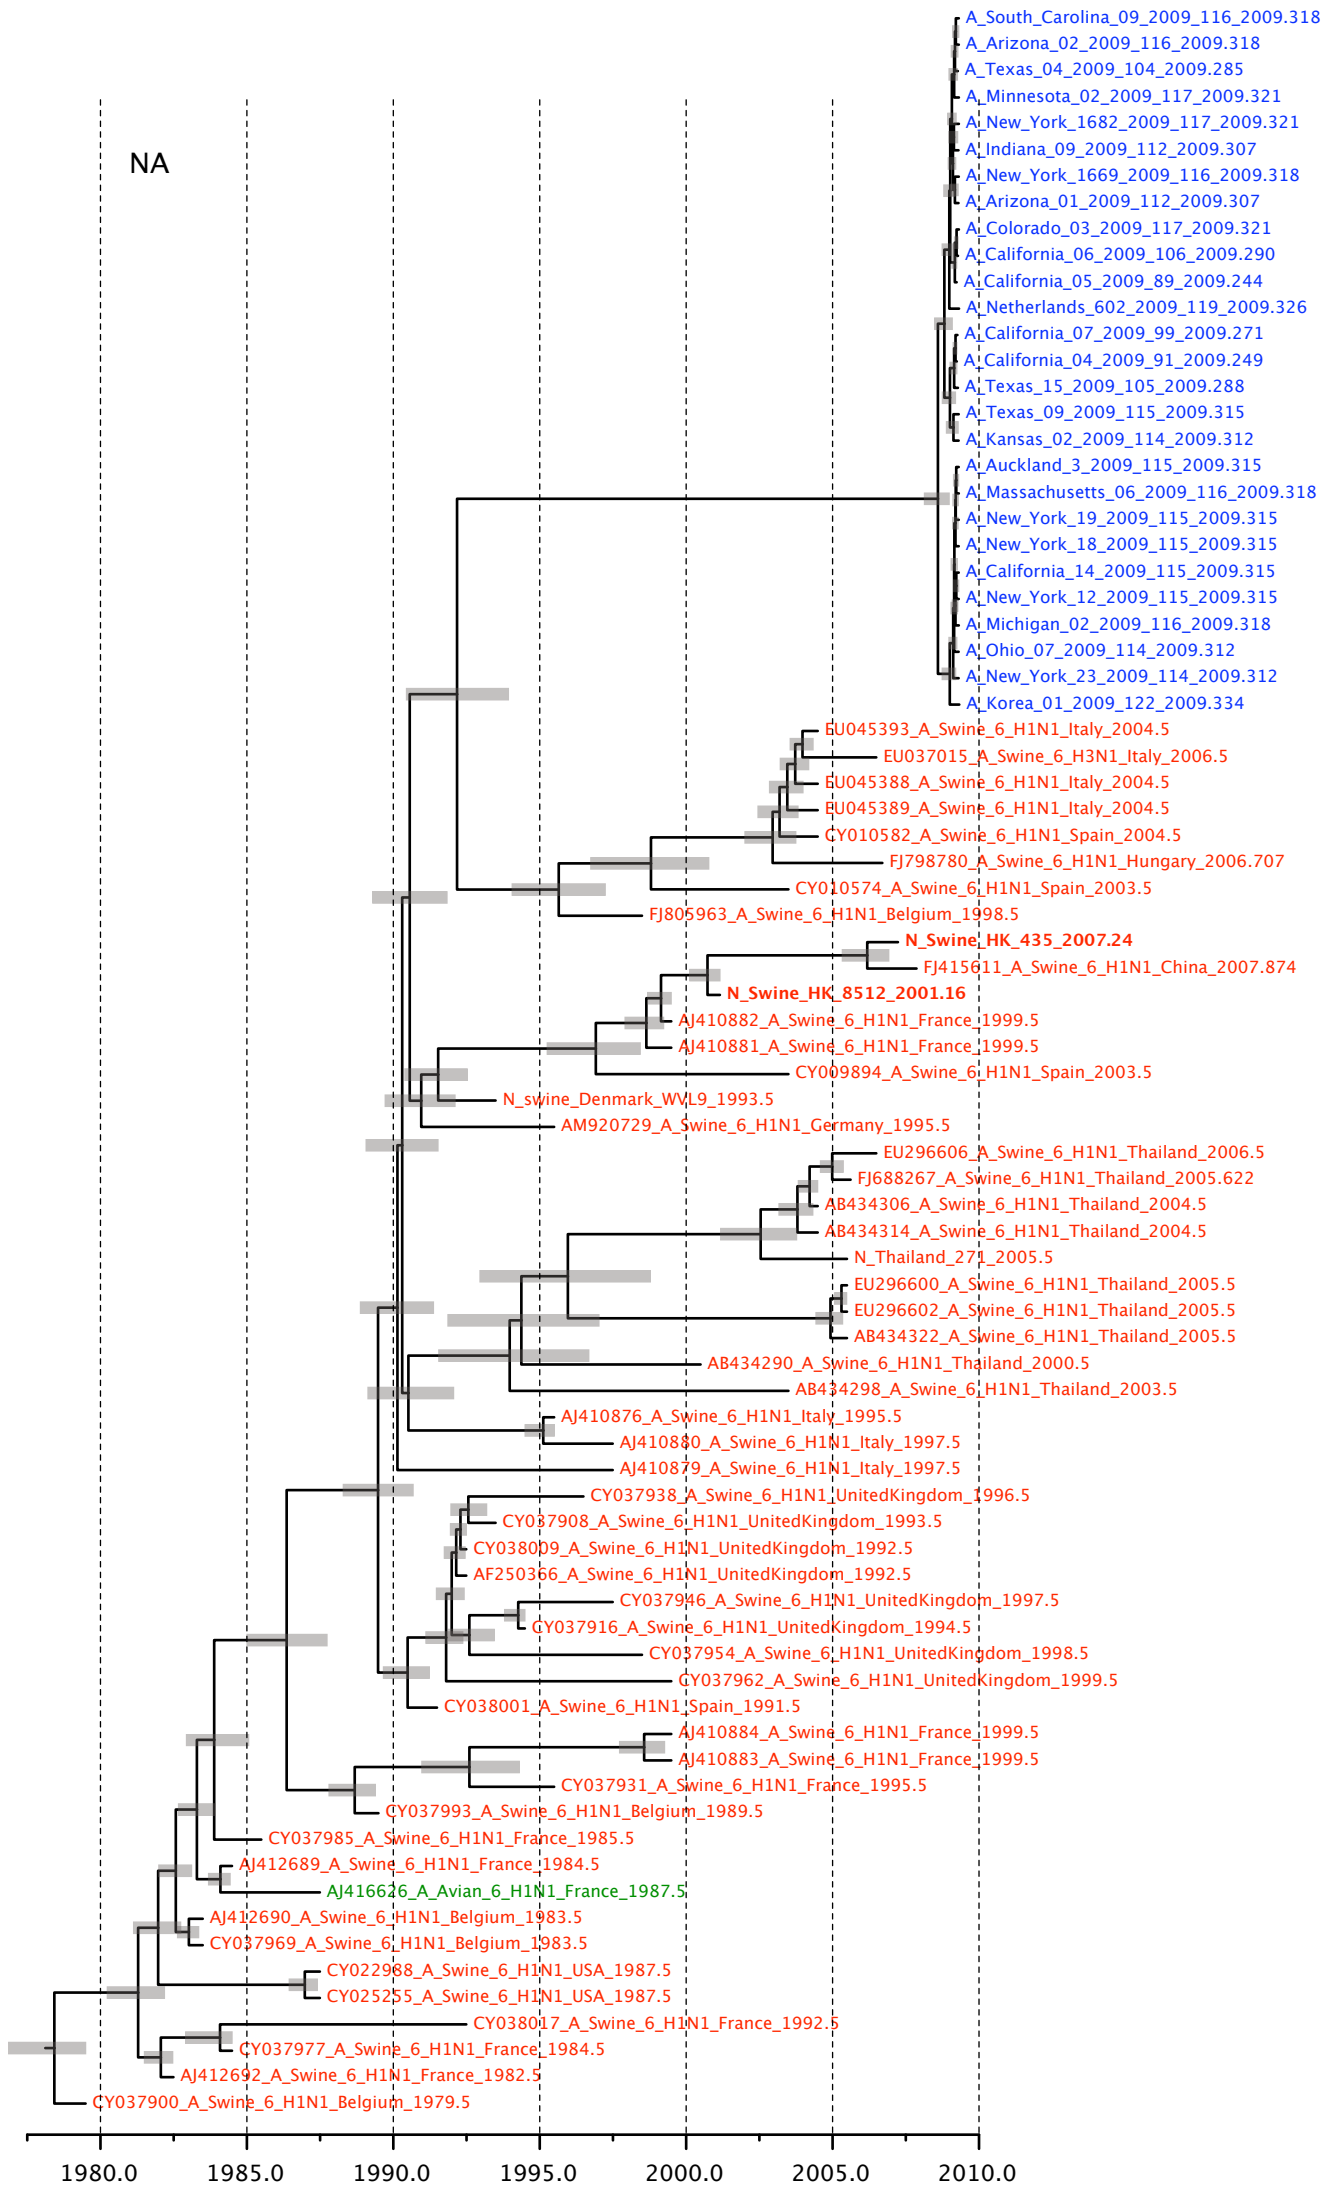



M

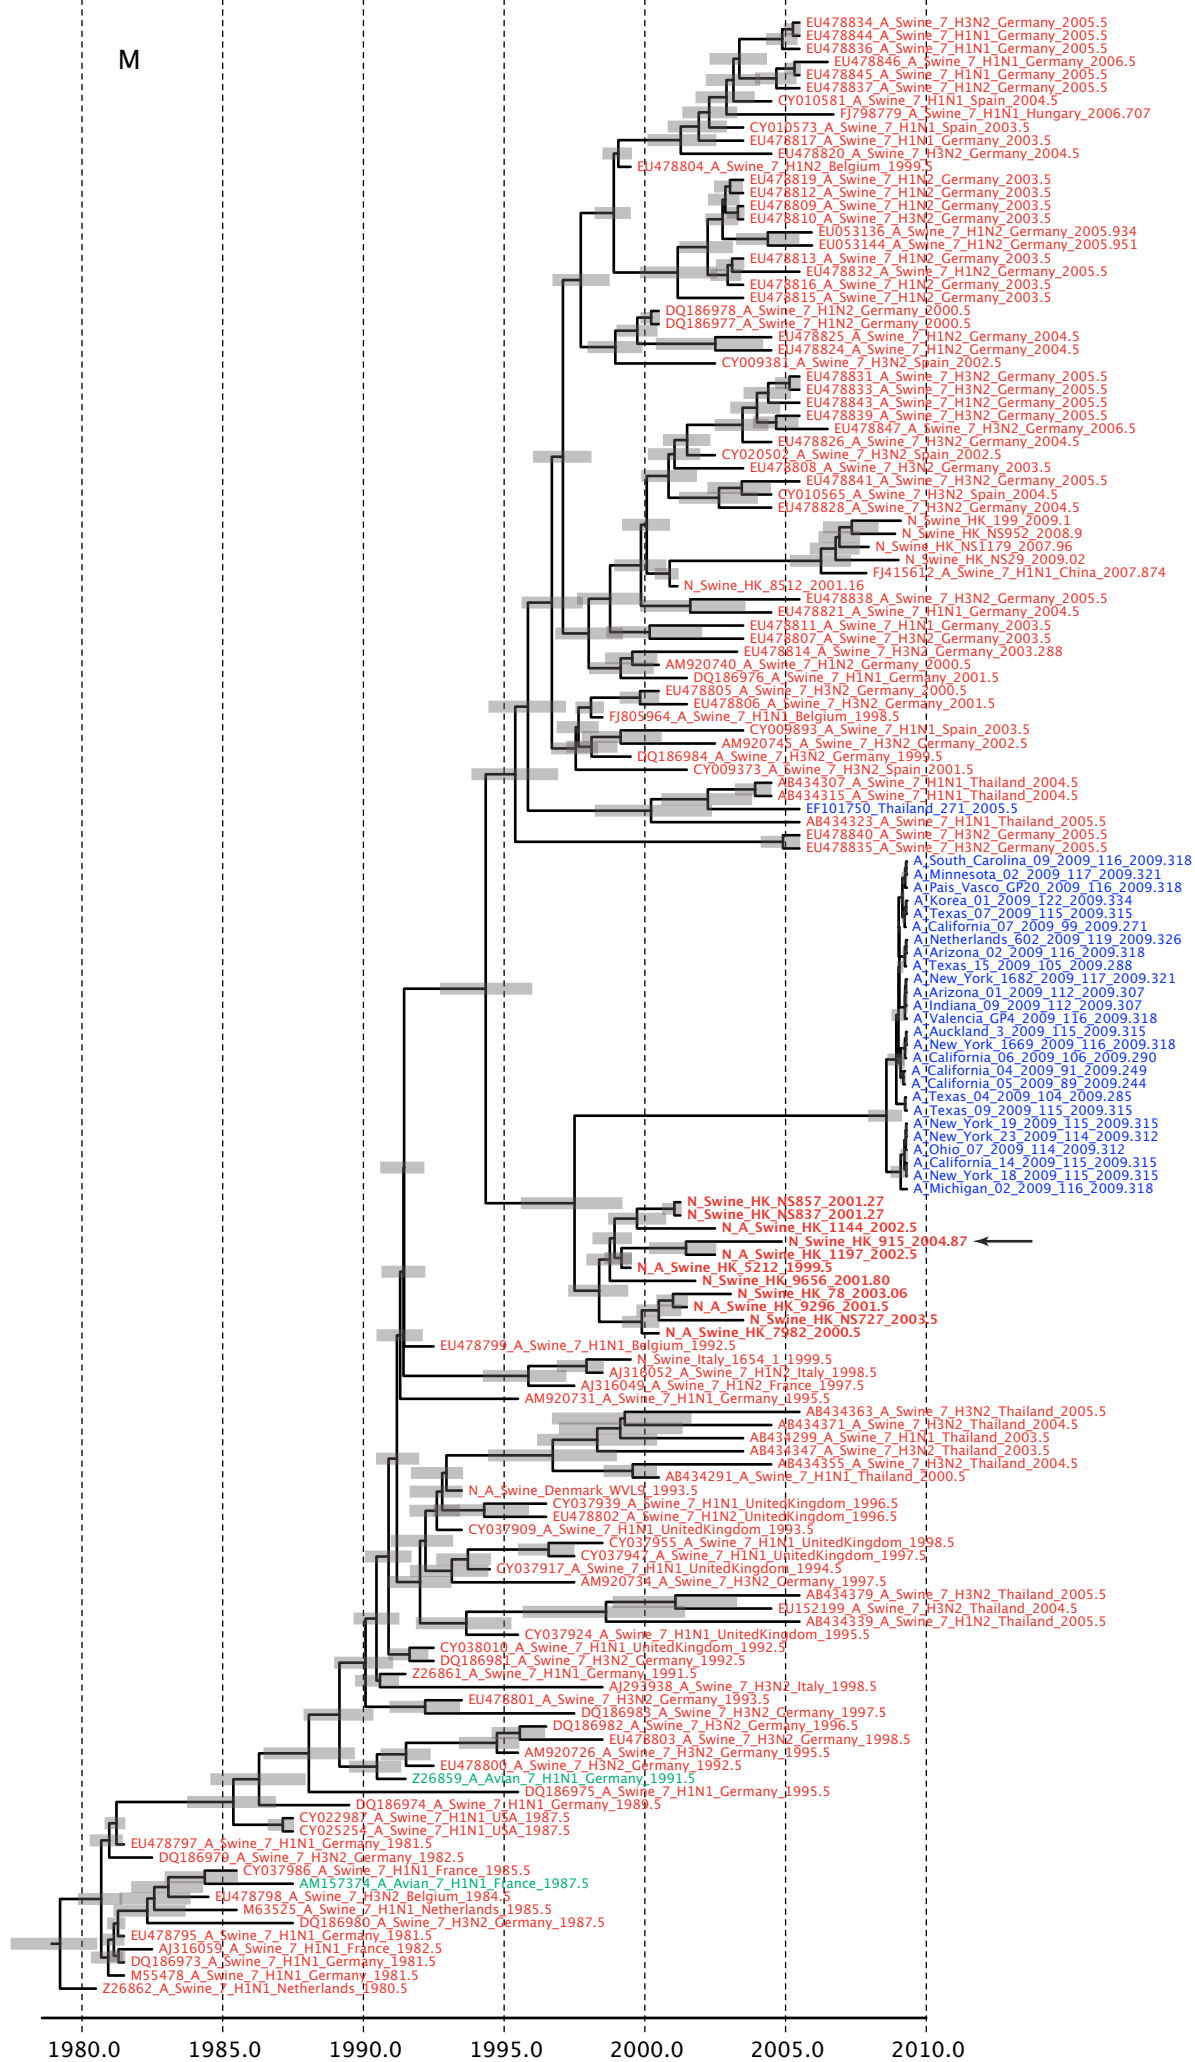

NS

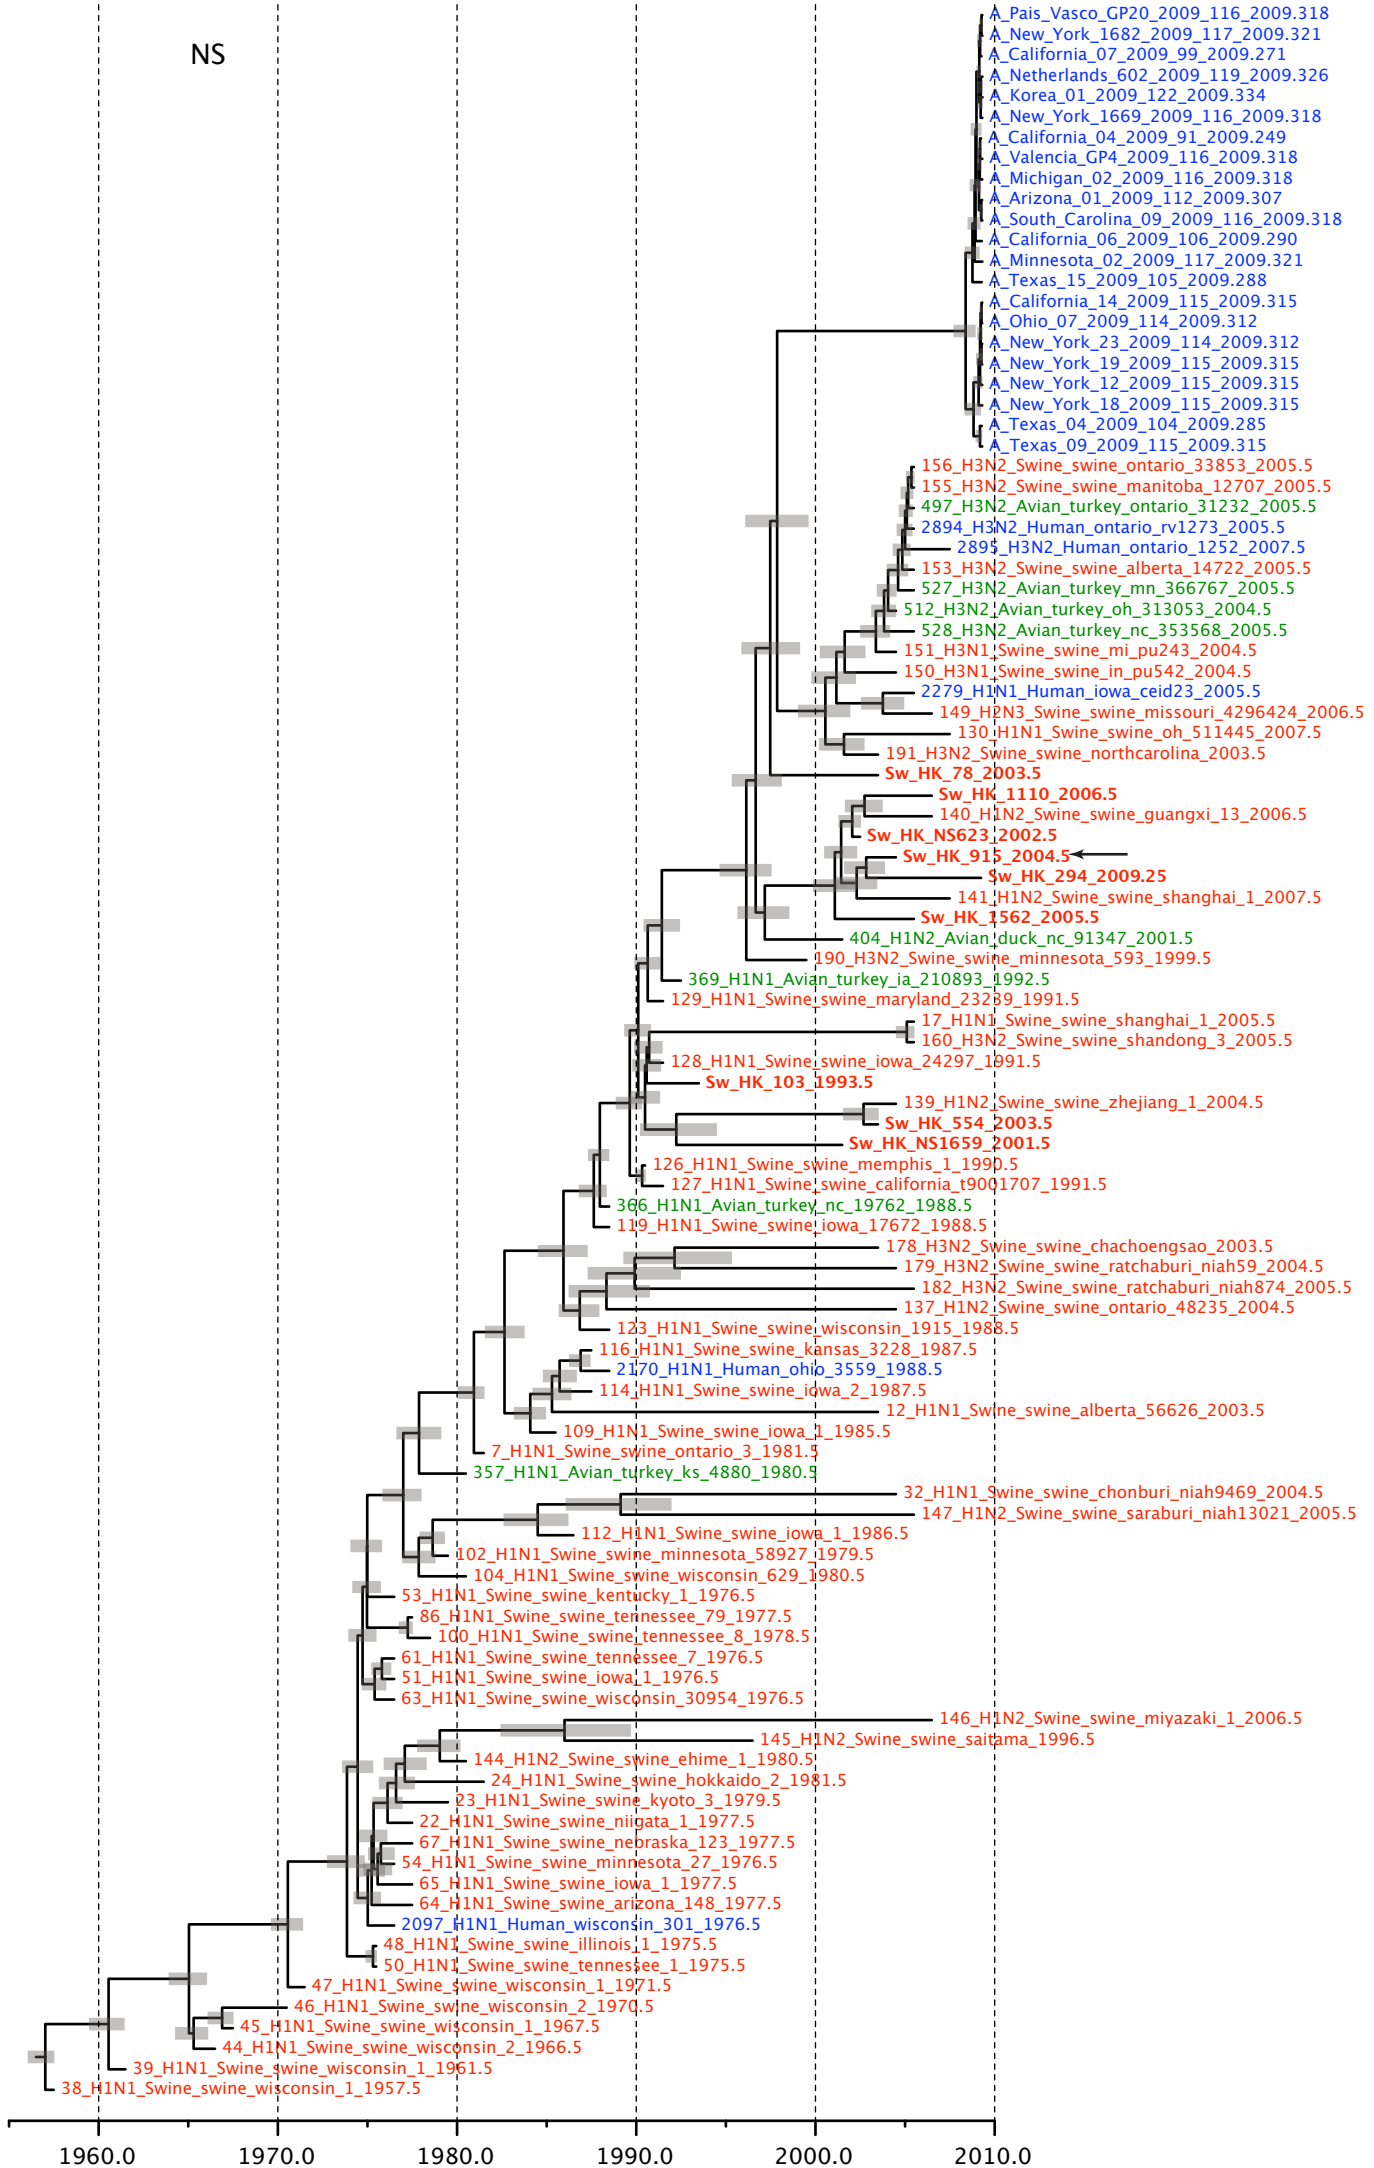

**Supplementary Figure 3.** For each gene segment (PB2, PB1, PA, HA, NP, NA, M & NS), we plot the isolation date of each influenza sequence against the genetic distance from that sequence to the root of the phylogeny. The linear regression gradient is therefore an estimate of the rate of sequence evolution and the x-intercept is an estimate of the TMRCA of the whole phylogeny. Phylogenies were estimated using neighbour-joining, with rooting chosen to maximise the regression fit. The chosen root was typically very close to the earliest sampled sequence. Residual analysis was performed to identify and remove significant outliers, which most likely result from isolation data annotation errors in the sequence database. For each gene, the degree of scatter about the linear regression reflects evolutionary rate heterogeneity among lineages, such that a "strict clock" corresponds to all the points falling exactly on the regression line. The 2009 outbreak sequences (highlighted in light blue) are entirely typically of the long term trends in divergence, hence there is no evidence that the branch leading to the outbreak has evolved unusually rapidly or slowly. For further discussion of this methodology, see Drummond AJ, Pybus OG, Rambaut A. 2003. Inference of viral evolutionary rates from molecular sequences. *Advances in Parasitology* **54**:331-358.



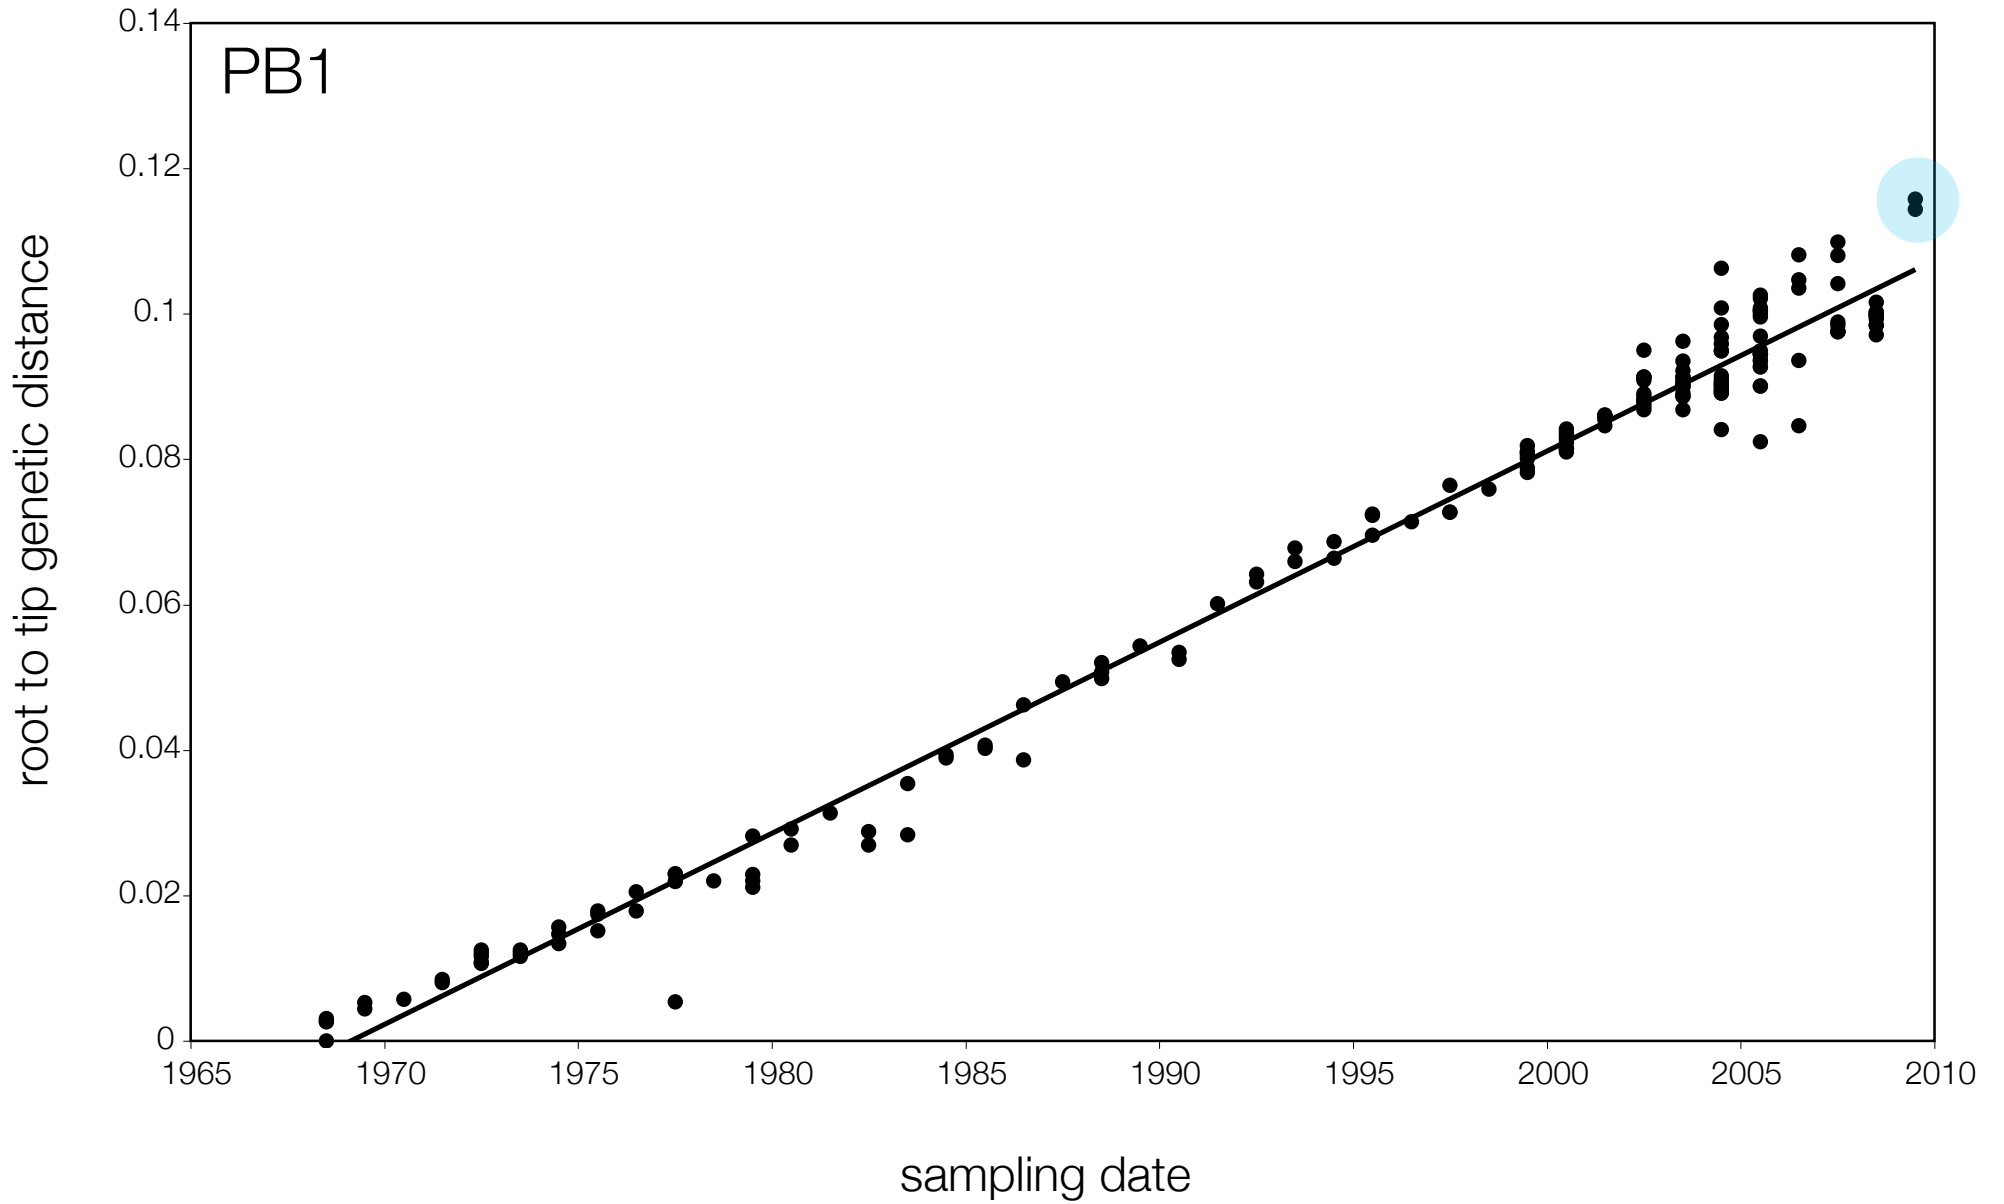

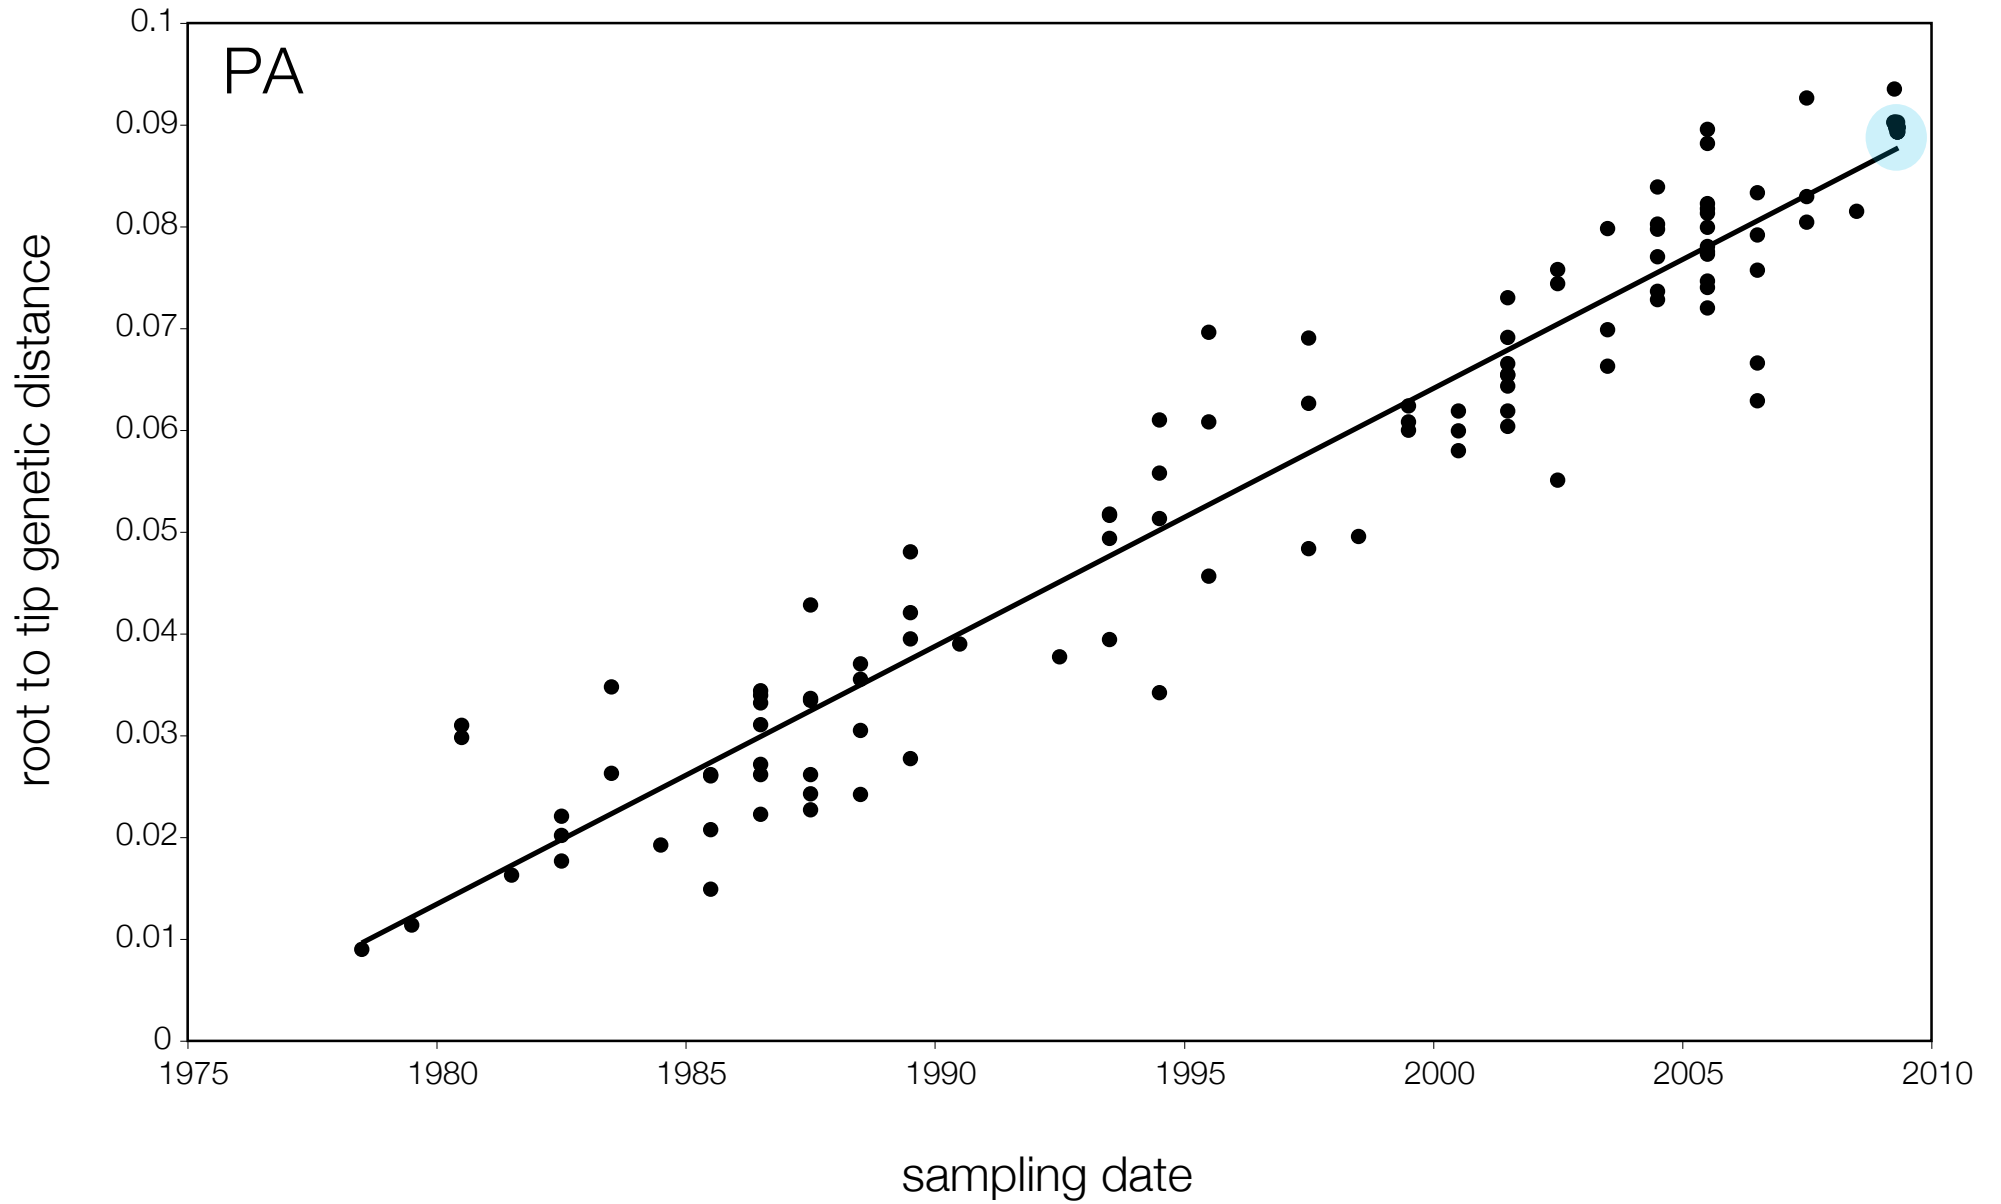

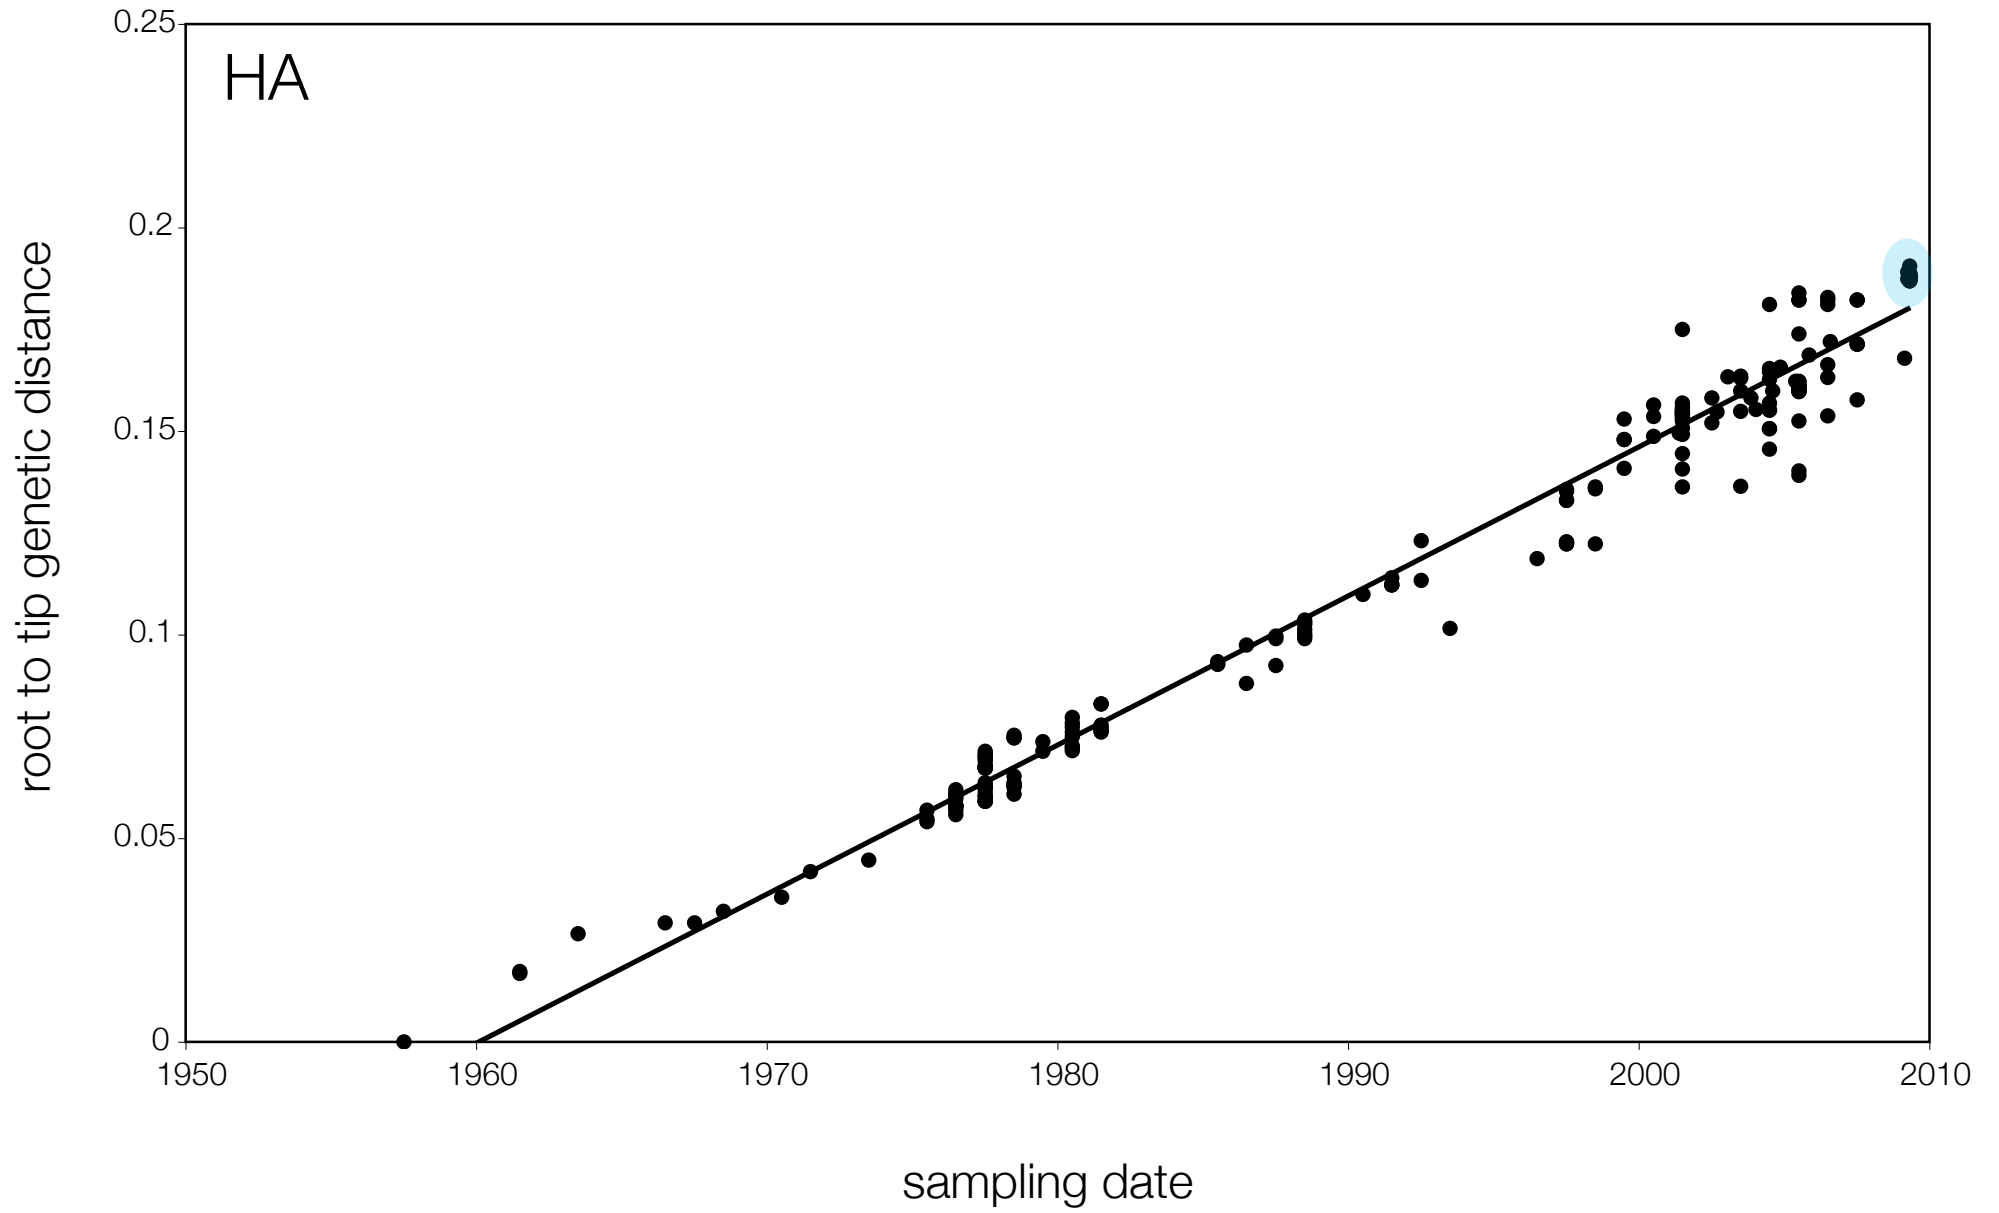

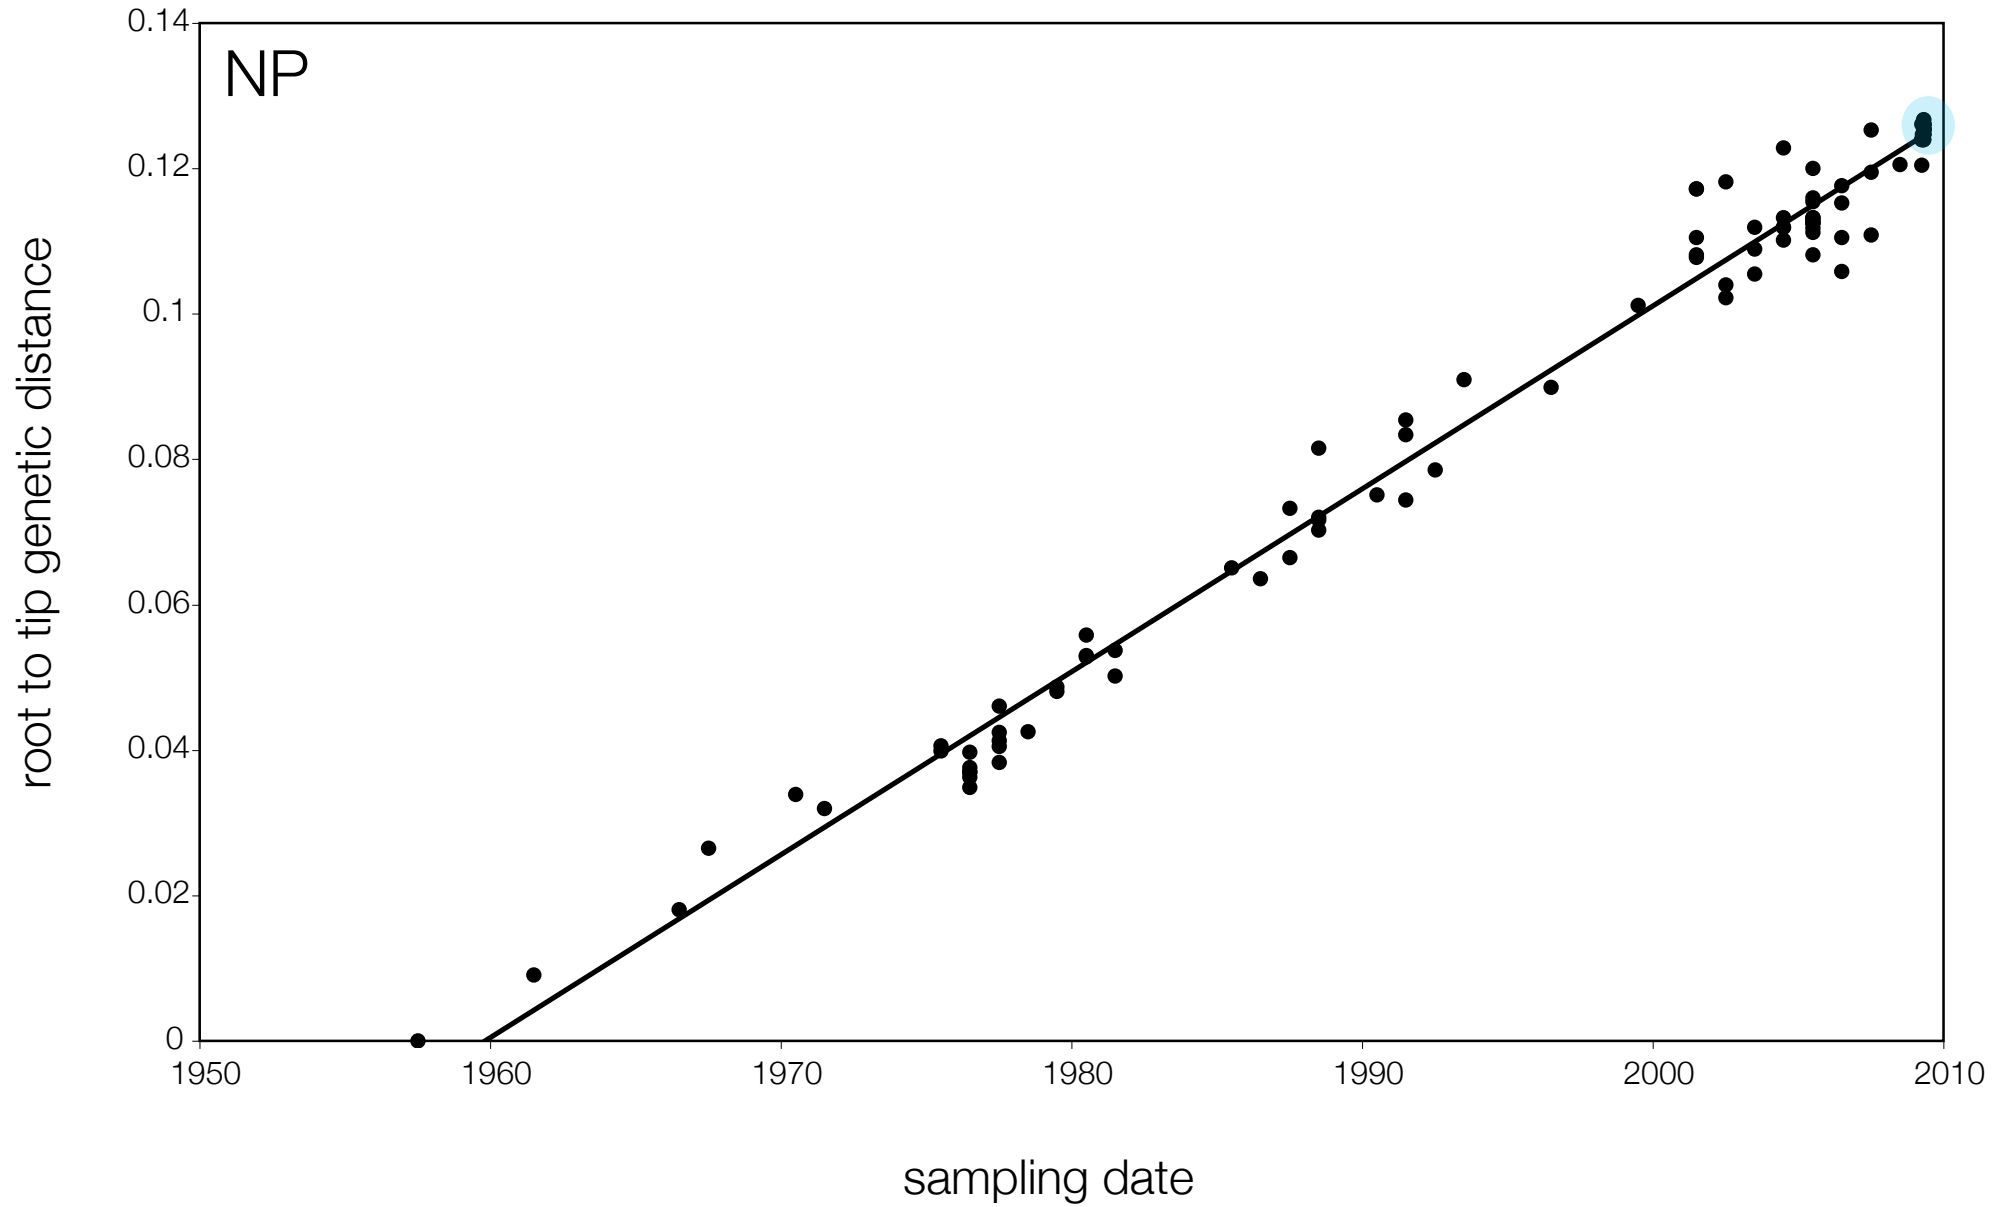



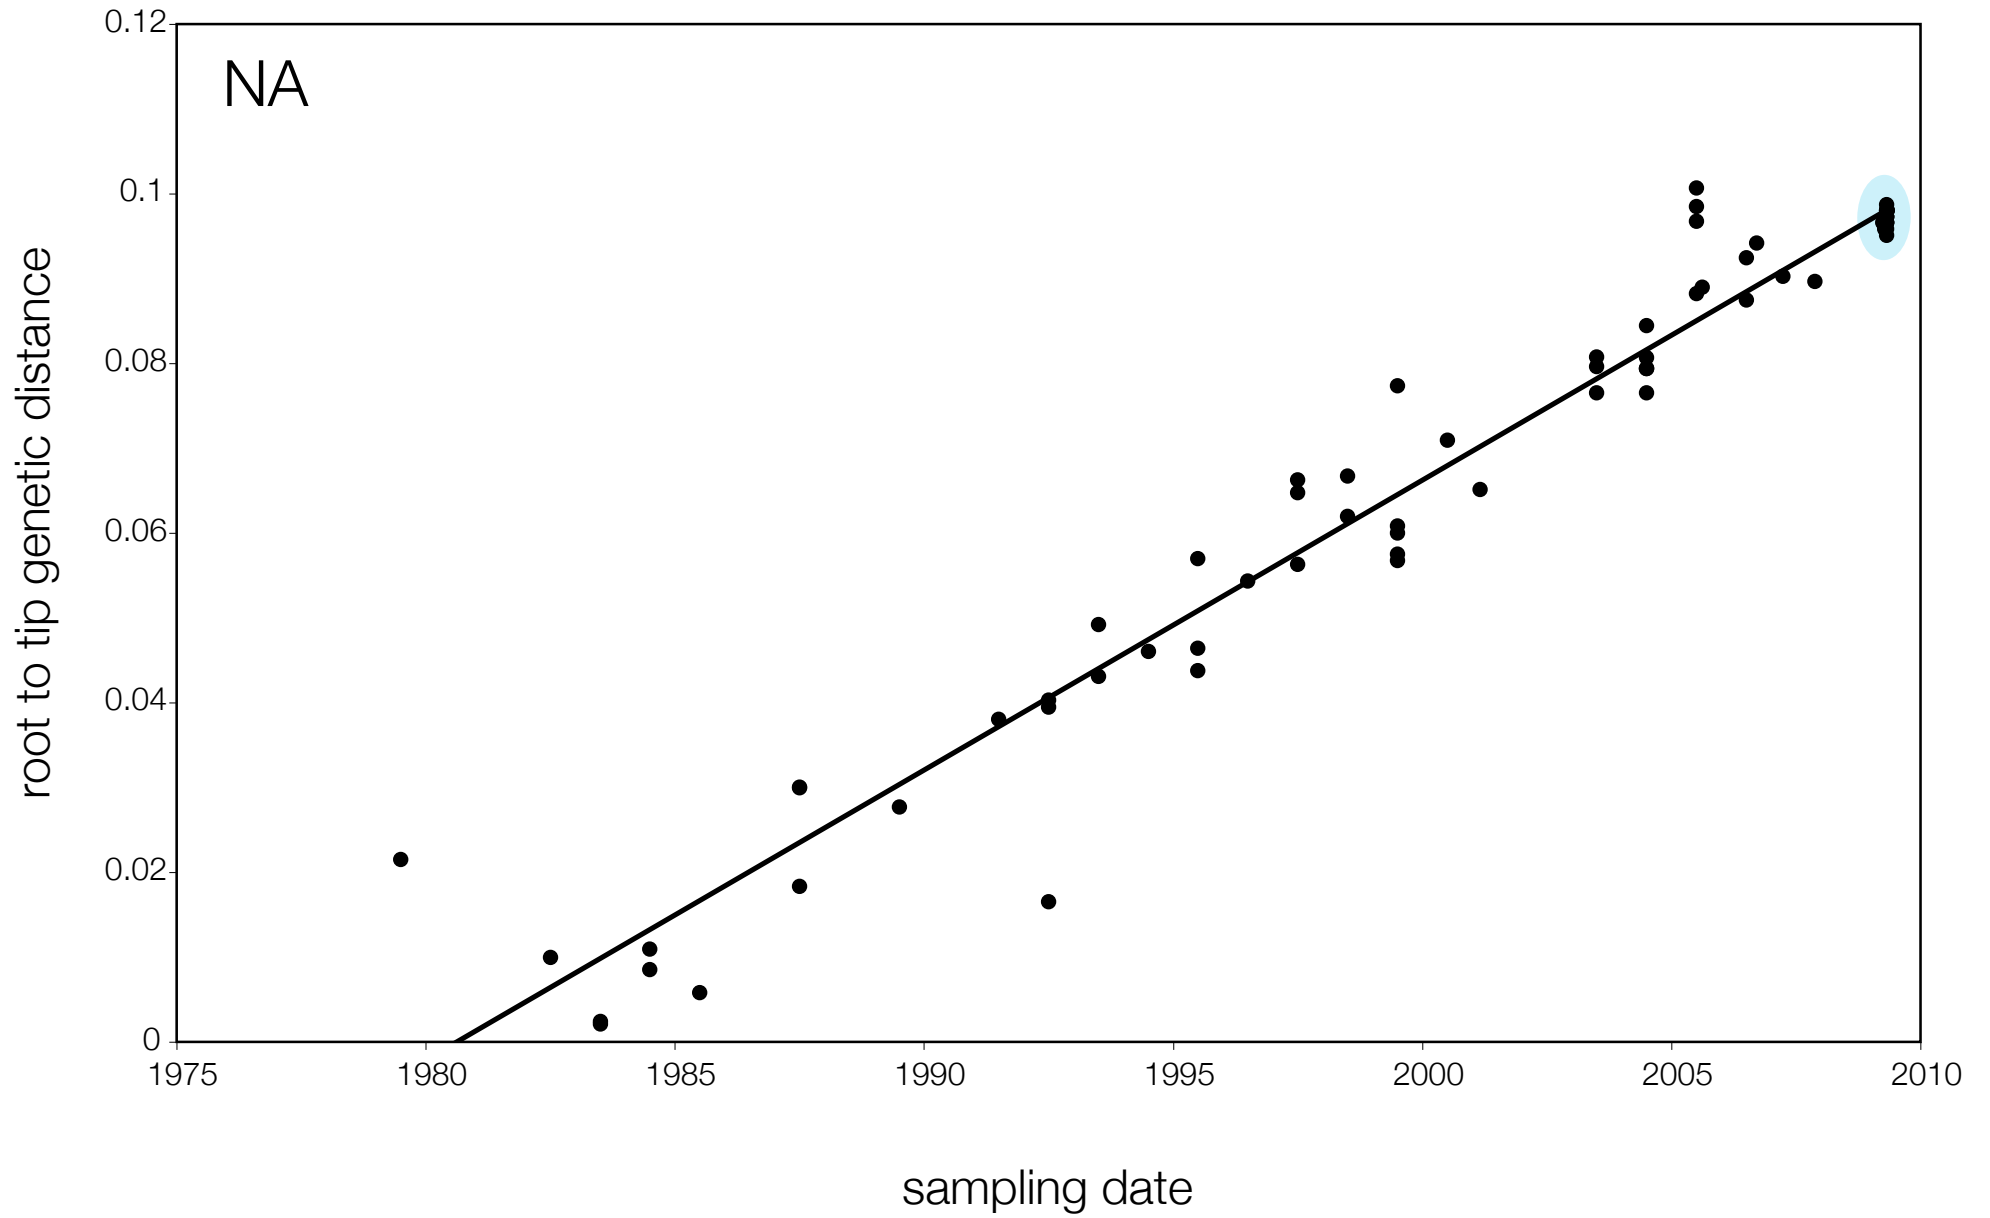

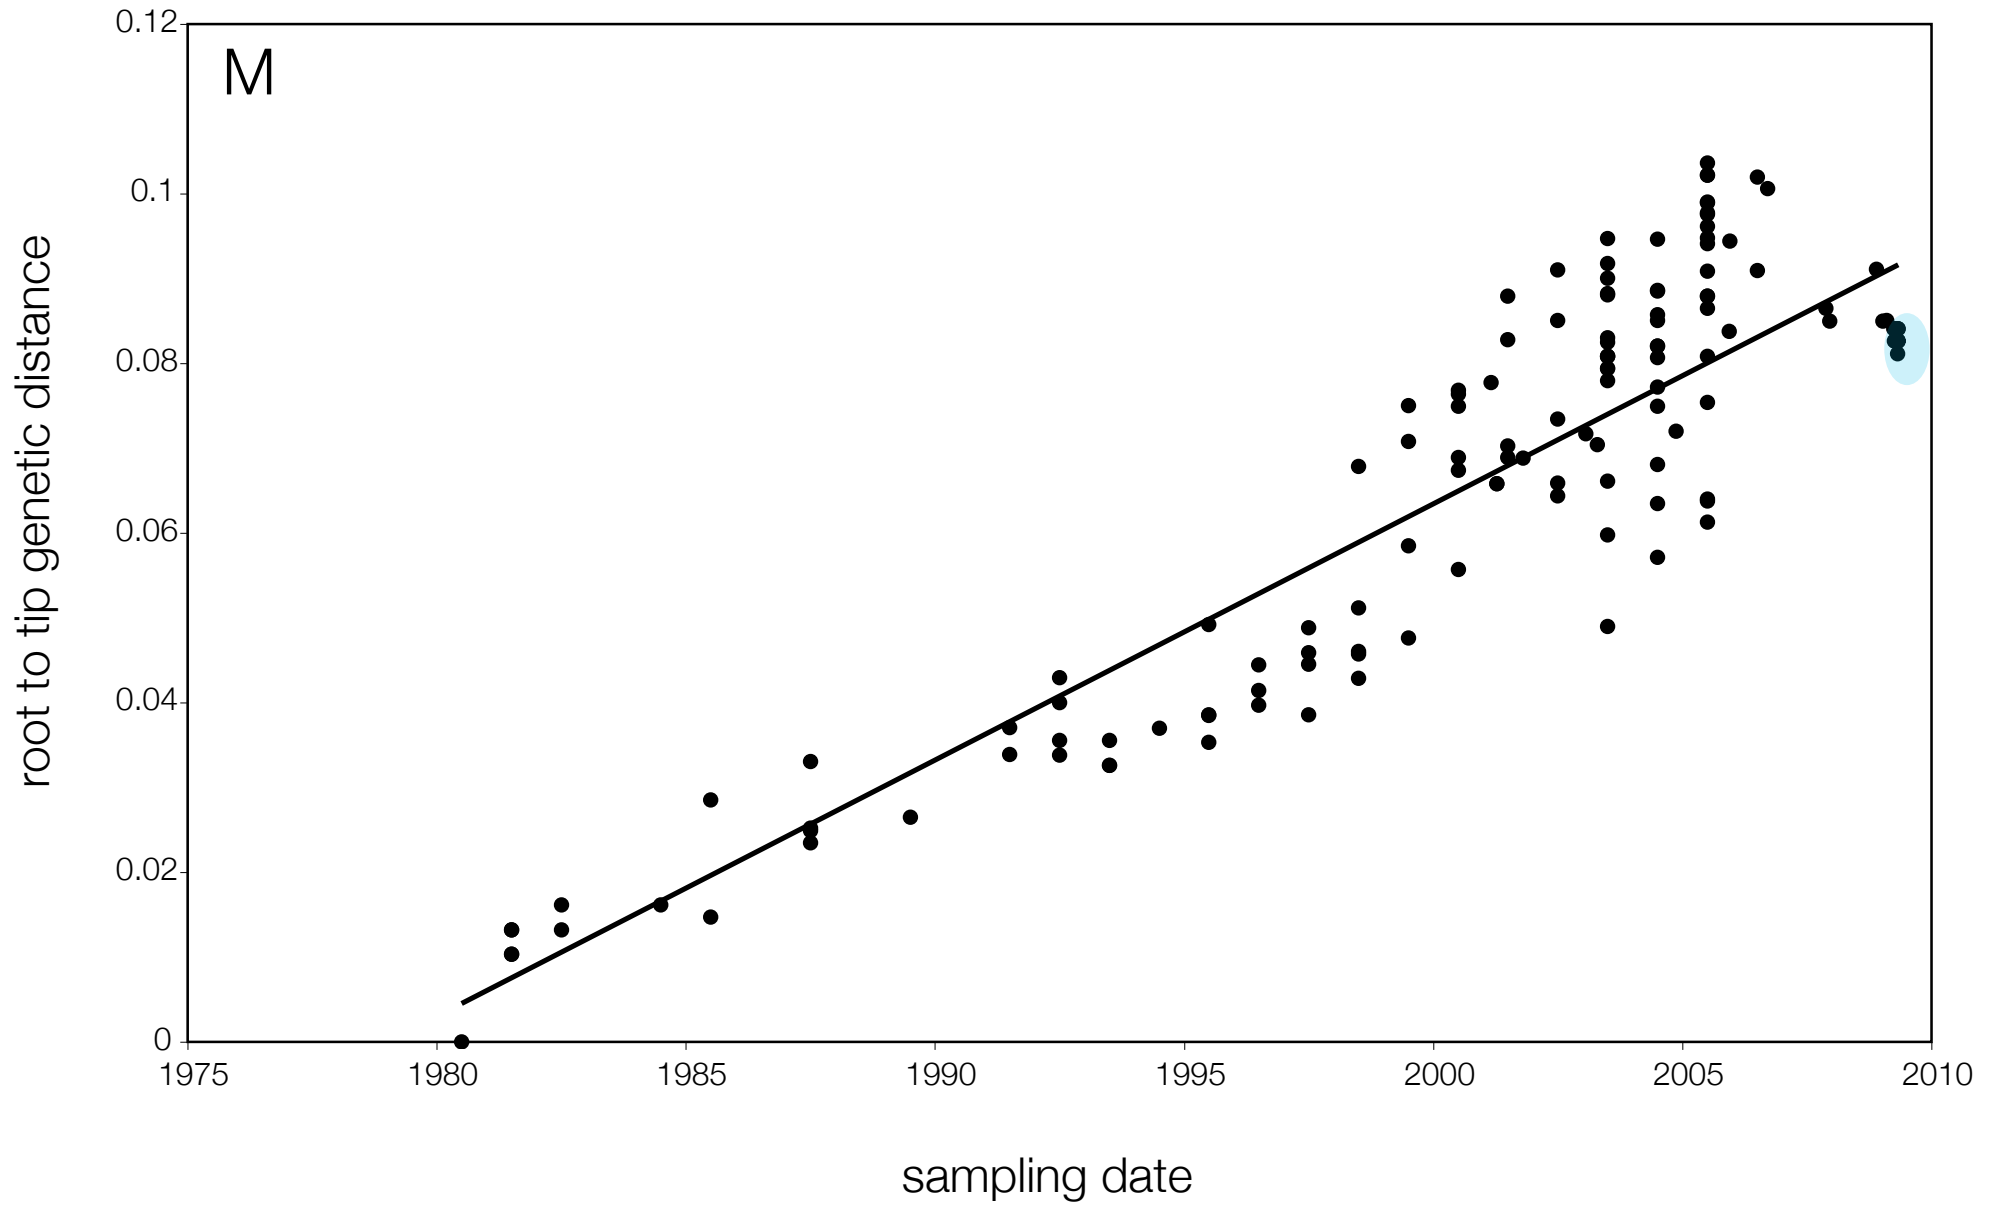

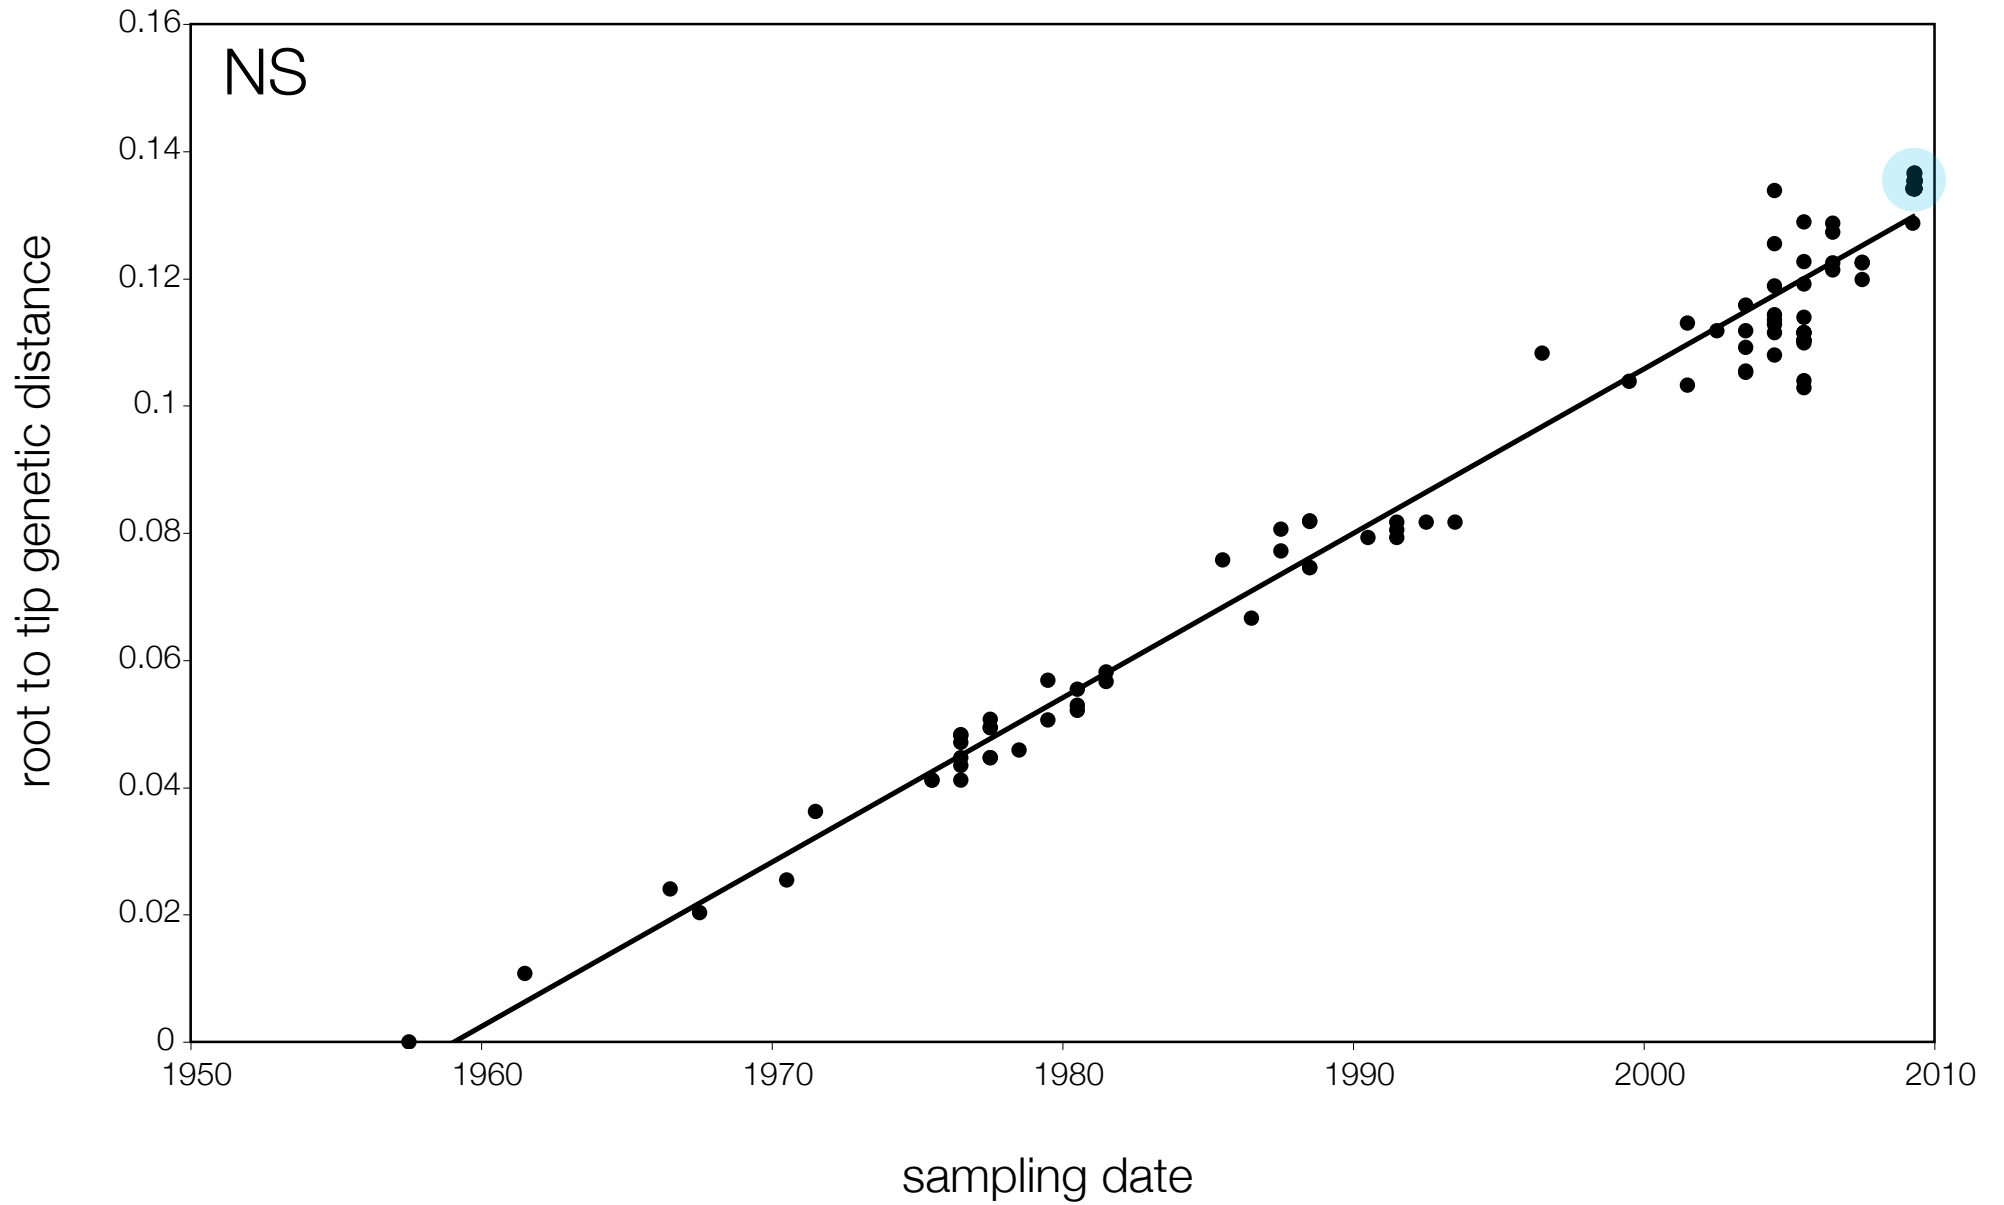

**Table S1 SLAC Results**

| gene | outbreak           | reference | estimated                  | mean TMRCA  |             |
|------|--------------------|-----------|----------------------------|-------------|-------------|
|      | dN/dS <sup>a</sup> | dN/dS     | relative rate <sup>b</sup> | mean TMRCA  | (adjusted)  |
| HA   | 0.32               | 0.21      | 1.22                       | 28-Aug-2008 | 11-Oct-2008 |
| NA   | 0.26               | 0.18      | 1.16                       | 8-Aug-2008  | 12-Sep-2008 |
| MP   | 0.19               | 0.05      | 1.43                       | 3-Aug-2008  | 26-Oct-2008 |
| NP   | 0.18               | 0.05      | 1.39                       | 27-Mar-2008 | 19-Jul-2008 |
| NS   | 2.15               | 0.23      | 3.85                       | 21-May-2008 | 6-Feb-2009  |
| PA   | 0.11               | 0.06      | 1.15                       | 7-Oct-2008  | 6-Nov-2008  |
| PB1  | 0.212              | 0.06      | 1.45                       | 24-Oct-2008 | 22-Dec-2008 |
| PB2  | 0.15               | 0.11      | 1.11                       | 9-Sep-2008  | 4-Oct-2008  |

<sup>a</sup>Calculated using SLAC (S. Kosakovsky Pond, available at <http://datamonkey.org>)

<sup>b</sup>substitution rate in outbreak clade relative to non-outbreak sequences based on excess non-synonymous mutations inferred from the higher dN/dS ratio.

**Table S2 SNAP Results**

| gene | outbreak           | reference | estimated                  | mean TMRCA  |             |
|------|--------------------|-----------|----------------------------|-------------|-------------|
|      | dN/dS <sup>a</sup> | dN/dS     | relative rate <sup>b</sup> | mean TMRCA  | (adjusted)  |
| HA   | 0.24               | 0.09      | 1.41                       | 28-Aug-2008 | 9-Nov-2008  |
| NA   | 0.32               | 0.1       | 1.59                       | 8-Aug-2008  | 17-Nov-2008 |
| MP   | 0.3                | 0.03      | 1.82                       | 3-Aug-2008  | 5-Dec-2008  |
| NP   | 0.14               | 0.02      | 1.39                       | 27-Mar-2008 | 19-Jul-2008 |
| NS   | 0.31               | 0.13      | 1.43                       | 21-May-2008 | 5-Sep-2008  |
| PA   | 0.18               | 0.05      | 1.43                       | 7-Oct-2008  | 10-Dec-2008 |
| PB1  | 0.16               | 0.03      | 1.45                       | 24-Oct-2008 | 22-Dec-2008 |
| PB2  | 0.13               | 0.07      | 1.15                       | 9-Sep-2008  | 10-Oct-2008 |

<sup>a</sup>Calculated using SNAP (B. Korber, available at <http://www.hiv.lanl.gov/content/sequence/SNAP/SNAP.html>)

<sup>b</sup>substitution rate in outbreak clade relative to non-outbreak sequences based on excess non-synonymous mutations inferred from the higher dN/dS ratio.

**Table S3 Hong Kong swine genetic origins**

Lineage of segments from Sw/HK sequences based on  
Phylogenetic analysis

| All Seqs             | PB2 | PB1 | PA | HA<br>(H1) | NP | NA | M | NS |
|----------------------|-----|-----|----|------------|----|----|---|----|
| Swine/HK/103/93      | C   | C   | C  | C          | C  | N1 | C | C  |
| Sw/HK/NS1659/01      | C   | C   | C  | C          | C  | N1 | C | C  |
| Sw/HK/8512/01        | C   | E   | E  | E          | E  | N1 | E | E  |
| Sw/HK/NS837/01       | E   | E   | E  | E          | C  | N1 | E | E  |
| Sw/HK/9656/01        | E   | E   | E  | E          | C  | N1 | E | E  |
| Sw/HK/NS1179/07      | E   | E   | E  | E          | E  | N1 | E | E  |
| Sw/HK/NS29/09        | E   | E   | E  | E          | E  | N1 | E | E  |
| Sw/HK/554/03         | C   | C   | C  | C          | C  | N2 | C | C  |
| Sw/HK/NS857/01       | E   | E   | E  | E          | C  | N2 | E | E  |
| Sw/HK/NS623/02       | T   | T   | T  | T          | T  | N2 | T | T  |
| Sw/HK/78/03          | T   | H   | T  | T          | T  | N2 | E | T  |
| Sw/HK/1110/06        | T   | T   | T  | T          | T  | N2 | T | T  |
| Sw/HK/915/04         | T   | T   | T  | T          | T  | N2 | E | T  |
| Sw/HK/1562/05        | T   | T   | T  | T          | T  | N2 | T | T  |
| Sw/HK/294/09         | T   | T   | T  | C          | T  | N2 | T | T  |
| A/California/04/2009 | T   | T   | T  | T          | T  | N1 | E | T  |

|                    |   |
|--------------------|---|
| Classical Swine    | C |
| Eurasian Swine     | E |
| Triple Reassortant | T |
| Human              | H |

**Table S4 S-OIV sequences available on NCBI Influenza virus database at time of analysis.**

|                          | Days <sup>1</sup> | PB2 <sup>2</sup> | PB1      | PA       | HA       | NP       | NA       | MP       | NS       |
|--------------------------|-------------------|------------------|----------|----------|----------|----------|----------|----------|----------|
| A/Arizona/01/2009        | 112               |                  |          |          | GQ117067 | GQ117063 | GQ117064 | GQ117066 | GQ117065 |
| A/Arizona/02/2009        | 116               | GQ117076         | GQ117075 |          | GQ117079 | GQ117074 | GQ117077 | GQ117078 |          |
| A/Auckland/3/2009        | 115               |                  |          |          |          |          | FJ973552 | FJ973553 |          |
| A/California/04/2009     | 91                | FJ966079         | FJ966080 | FJ966081 | FJ966082 | FJ966083 | FJ966084 | FJ966085 | FJ966086 |
| A/California/05/2009     | 89                | FJ966955         | FJ966958 | FJ966957 | FJ966952 | FJ966953 | FJ966956 | FJ966954 |          |
| A/California/06/2009     | 106               | FJ966963         | FJ966965 | FJ966964 | FJ966960 | FJ966961 | FJ971075 | FJ966962 | FJ971074 |
| A/California/07/2009     | 99                | FJ984387         | FJ969531 | FJ969529 | FJ981613 |          | FJ984386 | FJ966975 |          |
| A/California/14/2009     | 115               | GQ117035         | GQ117034 | GQ117037 | GQ117040 | GQ117033 | GQ117036 | GQ117039 | GQ117038 |
| A/Colorado/03/2009       | 117               |                  |          |          | GQ117119 | GQ117117 | GQ117118 |          |          |
| A/Indiana/09/2009        | 112               |                  | GQ117093 | GQ117095 | GQ117097 | GQ117092 | GQ117094 | GQ117096 |          |
| A/Kansas/02/2009         | 114               |                  |          |          | GQ117059 | GQ117057 | GQ117058 |          |          |
| A/Korea/01/2009          | 122               |                  |          |          | GQ131023 | GQ131024 | GQ132185 | GQ131025 | GQ131026 |
| A/Massachusetts/06/2009  | 116               |                  |          |          | GQ117043 | GQ117041 | GQ117042 |          |          |
| A/Michigan/02/2009       | 116               |                  |          | GQ117109 | GQ117112 | GQ117107 | GQ117108 | GQ117111 | GQ117110 |
| A/Minnesota/02/2009      | 117               | GQ117070         | GQ117069 |          |          | GQ117068 | GQ117071 | GQ117073 | GQ117072 |
| A/Netherlands/602/2009   | 119               |                  |          |          | CY039527 |          | CY039528 |          |          |
| A/New York/1669/2009     | 116               | CY039900         | CY039899 | CY039898 | CY039893 | CY039896 | CY039895 | CY039894 | CY039897 |
| A/New York/1682/2009     | 117               | CY039908         | CY039907 | CY039906 | CY039901 | CY039904 | CY039903 | CY039902 | CY039905 |
| A/New York/12/2009       | 115               |                  |          |          | FJ984337 | FJ984336 | FJ984335 |          | FJ984334 |
| A/New York/18/2009       | 115               | FJ984351         | FJ984353 | FJ984354 | FJ984355 | FJ984352 | FJ984350 | FJ984348 | FJ984349 |
| A/New York/19/2009       | 115               |                  | FJ984392 | FJ984393 | FJ984394 | FJ984391 | FJ984390 | FJ984388 | FJ984389 |
| A/New York/23/2009       | 114               |                  |          |          | FJ984364 | FJ984363 | FJ984362 |          | FJ984361 |
| A/Ohio/07/2009           | 114               |                  |          | FJ984401 | GQ117100 | GQ117098 | GQ117099 |          |          |
| A/Pais Vasco/GP20/2009   | 116               |                  |          |          | FJ985763 | FJ985761 | FJ985764 | FJ985760 | FJ985762 |
| A/South Carolina/09/2009 | 116               |                  |          |          | GQ117056 | GQ117052 | GQ117053 | GQ117055 | GQ117054 |
| A/Texas/04/2009          | 104               | FJ969525         | FJ981615 | FJ981618 | FJ981614 | FJ981617 | FJ981620 | FJ966980 |          |
| A/Texas/07/2009          | 115               | GQ117089         | GQ117088 |          | GQ117091 | GQ117087 |          | GQ117090 |          |
| A/Texas/09/2009          | 115               | GQ117027         | GQ117026 | GQ117029 | GQ117032 | GQ117025 | GQ117028 | GQ117031 | GQ117030 |
| A/Texas/15/2009          | 105               |                  | GQ122094 |          | GQ122097 | GQ122092 | GQ122096 | GQ122095 | GQ122093 |
| A/Valencia/GP4/2009      | 116               |                  |          |          | FJ985758 | FJ985756 | FJ985759 | FJ985755 | FJ985757 |

1. The sampling date as number of days since 1-Jan-2009.

2. Accession numbers for each available genomic segment

**Supplementary notes:****Adaptation and purifying selection**

We suggest in the main text that the increased presence of amino-acid polymorphisms may be present in the outbreak sequences relative to the swine influenza reference sequences due to the rapid growth in number of infections and the small window of time over which they were sampled. The fairly uniform distribution of non-synonymous changes across the outbreak genomes (data not shown) and the relatively consistent dN/dS ratios across genes (Supplementary Tables S1 & S2) support this view. We predict that many of these mutations will be mildly deleterious and, given time, will be removed by purifying selection along an emergent ‘trunk’ lineage, and that the estimated evolutionary rate and gene-specific dN/dS pattern will approach that observed in the swine influenza data sets sampled over a time period of decades (see below). An interesting alternative is that the elevated rate in the outbreak sequences (and higher dN/dS ratio) is due to a burst of adaptive evolution in a new host, rather than a relaxation of purifying selection and that many of the ‘extra’ non-synonymous mutations will become fixed in the population. If the current outbreak persists in the human population, it will be possible to distinguish these hypotheses.

**Detailed molecular characterization**

The presence of residue Asn 31 in the M2 protein invariably confers resistance to the adamantanes, a group of antiviral drugs used for treatment of human influenza<sup>1</sup>.

Sequence analysis revealed that Asn 31 was present in all human isolates of the current outbreak, this mutation was also present in swine H1N1 and H1N2 viruses that were most closely related in the M gene. The widespread occurrence of the Asn 31 mutation in closely related viruses indicate that it may have descended from the



swine lineage of amantadine-resistant M2 genes rather than independently acquired. It should be noted that majority of the seasonal H1N1 and H3N2 viruses are resistant to amantadine, except Brisbane-like H1N1 viruses<sup>2</sup>. No mutations were observed in the NA gene that confers Oseltamivir resistance.

The molecular determinants of interspecies transmission of the A/California/04/2009-like virus to humans are unclear. In these viruses the amino acid residue at the receptor binding pocket of HA1— position Gln 226 and Gly 228 retain configurations (2,3-NeuAcGal linkages) predicted to have affinity for mammalian cell-surface receptors<sup>3-4</sup>. Amino acid residues relevant to receptor binding were identical to those of classical swine H1N1 and North American H1N1 and recent H1N1 viruses in both the 130-loop and 190-helix. However, the amino acids at positions 133 and 135 are different from the current seasonal vaccine strain A/Brisbane/59/2007(H1N1) used in both the northern and southern hemispheres, indicating that these viruses may show less cross-reaction to the current vaccine strain<sup>5-6</sup>.

Mutations Glu627Lys and Asp701Asn of the PB2 gene that are thought to be associated with adaptation to mammals and increased virulence of influenza viruses in mice were not present<sup>7-12</sup>. The C terminal of the NS1 gene is truncated in the A/California/04/2009-like viruses and four residues of the PDZ ligand domain are not present<sup>11</sup>.

### Supplementary Methods

Viral RNA was directly extracted from infected allantoic fluid or cell culture using QIAamp viral RNA minikit (Qiagen, Inc., Valencia, Calif.). cDNA were synthesized by reverse transcription reaction and gene amplification by PCR were performed

using specific primers for each gene segments. PCR products were purified with the QIAquick PCR purification kit (Qiagen Inc.) and sequenced by synthetic oligonucleotides. Reactions were performed using Big Dye-Terminator v3.1 Cycle Sequencing Reaction Kit on an ABI PRISM 3700 DNA Analyzer (Applied Biosystems) following the manufacturer's instructions. All sequences were assembled and edited with Lasergene version 6.1 (DNASTAR, Madison, WI). Full genome sequences of these viruses are available for download at GISAID under the accession numbers (EPI177540 to EPI77658 and EPI177947).

### References:

1. Scholtissek, C., Quack, G., Klenk, H. D. & Webster, R. G. How to overcome resistance of influenza A viruses against adamantane derivatives. *Antiviral Res.* **37**, 83–95 (1998).
2. Barr, I. G., Deng, Y. M., Iannello, P., Hurt, A. C. & Komadina, N. Adamantane resistance in influenza A (H1) viruses increased in 2007 in South East Asia but decreased in Australia and some other countries. *Antiviral Research* **80**, 200–205 (2008).
3. Wiley, D. C., Wilson, I. A. & Skehel, J. J. Structural identification of the antibody-binding sites of Hong Kong influenza haemagglutinin and their involvement in antigenic variation. *Nature* **289**, 373–378 (1981).
4. Rogers, G. N. *et al.* Single amino acid substitutions in influenza haemagglutinin change receptor binding specificity. *Nature* **304**, 76–78 (1983).

5. Winter, G., Fields, S. & Brownlee G. G. Nucleotide sequence of the haemagglutinin gene of a human influenza virus H1 subtype. *Nature* **292**, 72–75.
6. Canton, A., Brownlee, G. G., Yewdell, J. W. & Gerhard, W. The antigenic structure of the influenza virus A/PR/\*34 hemagglutinin (H1 subtype). *Cell* **31**, 417–27 (1982).
7. Hatta, M., Gai, P., Halfmann, P. & Kawaoka, Y. Molecular basis of high virulence of Hong Kong H5N1 influenza A viruses. *Science* **7**, 1840–1842 (2001)
8. Gabriel, G. I., Herwig, A. & Klenk, H.–D. Interaction of polymerase subunit PB2 and NP with importin  $\alpha$ 1 is a determinant of host range of influenza A virus. *PLoS Pathog.* **4**, e11 (2008).
9. Le, Q. M., Sakai-Tagawa, Y., Ozawa, M., Ito, M. & Kawaoka, Y. Selection of H5N1 Influenza Virus PB2 during Replication in Humans. *J. Virol.* **83**, 5278–5281 (2009).
10. Steel, J., Lowen, A. C., Mubareka, S. & Palese, P. Transmission of Influenza Virus in a Mammalian Host Is Increased by PB2 Amino Acids 627K or 627E/701N. *PLoS Pathog.* **5**, e1000252 (2009).
11. Obenauer, J. C. *et al.* Large-Scale Sequence Analysis of Avian Influenza Isolates. *Science* **311**, 1576–1580 (2006).
12. Jackson D, Hossain MJ, Hickman D, Perez DR, Lamb RA (2008) A new influenza virus virulence determinant: The NS1 protein four C-terminal residues modulate pathogenicity. *Proc. Natl. Acad. Sci. USA* **105**, 4381–4386 (2008).
